# Supplementary material
Source: MDPI journal article supplement (https://www.mdpi.com/2073-4441/15/24/4288)
Supplement: s1 [file s1]

## **SUPPLEMENTARY INFORMATION**

### **DATA COLLECTION**

**Supplementary Table S1.** Studies sampled from the Web of Science See attached .xls document – Supplemental\_Table S1.

## DATA ANALYSIS

### Supplementary Table S2

Two-way ANOVA comparison of publications investigating the impact of climate change on phytoplankton from different ecosystems (marine, fresh- and brackish water) from 2012 -2022

| Source of Variation | SS       | df | MS       | F        | P-value  |
|---------------------|----------|----|----------|----------|----------|
| Ecosystem           | 5695.364 | 3  | 1898.455 | 48.48056 | 2.18E-13 |
| Year                | 766.2273 | 10 | 76.62273 | 0.389277 | 0.942269 |
| Ecosystem x Year    | 800.1364 | 30 | 26.67121 | 2.872863 | 0.012282 |

**Supplementary Table S3.****Supplementary Table S3A**

Bayesian model selection testing the impact of the interaction between climate region (CR) and sampling year (Yr) on the number of publications (NP) on phytoplankton from different ecosystem. The mode with the lowest AIC offers the best fit to the data.

| <b>Ecosystem</b> | <b>Model*</b>                    | <b>AIC</b> | <b>Chisq</b> | <b>Ratio</b> | <b>p-value</b> |
|------------------|----------------------------------|------------|--------------|--------------|----------------|
| Marine           | $NP \sim Yr + CR + Yr \times CR$ | 273.6      | 58.7314      | 1.0324       | 0.0357         |
|                  | $NP \sim Yr + CR$                | 274.5      | 41.9921      | 1.0241       | 0.4277         |
|                  |                                  |            |              |              |                |
| Brackishwater    | $NP \sim Yr + CR + Yr \times CR$ | 255.1      | 62.9321      | 1.1091       | 0.0226         |
|                  | $NP \sim Yr + CR$                | 286.5      | 46.1423      | 1.62911      | 0.5232         |
|                  |                                  |            |              |              |                |
| Freshwater       | $NP \sim Yr + CR + Yr \times CR$ | 301.6      | 73.4923      | 1.1315       | 0.0403         |
|                  | $NP \sim Yr + CR$                | 460.2      | 44.3273      | 1.4624       | 0.4973         |

\* Model excludes *error term*; *hence only the* mean of NP at each value of the specified conditions (Yr and CR) were simulated.

**Supplementary Table S3B.** Parameter coefficient estimates from the Bayesian model on the number of publications by ecosystem. For each parameter, MCSE is the Monte Carlo standard error, N\_eff is a measure of effective sample size, and Rhat is the potential scale reduction factor on split chains (at convergence, Rhat = 1). The mean\_ppd is the sample average posterior predictive distribution of the outcome variable.

|                             | Fit Diagnostics |       |        |      |       |      |
|-----------------------------|-----------------|-------|--------|------|-------|------|
|                             | Mean            | SD    | 90% CI | MCSE | N_eff | Rhat |
| <b>Marine Ecosystem</b>     |                 |       |        |      |       |      |
| Intercept                   | -173.9          | 66.8  | -89.6  | 1.4  | 2238  | 1.0  |
| Year                        | 0.1             | 0.0   | 0.1    | 0.0  | 2240  | 1.0  |
| Climate Region              | 0.5             | 0.1   | 0.6    | 0.0  | 2540  | 1.0  |
| Year x Climate Region       |                 |       |        | 0.0  | 2524  | 1.0  |
| Reciprocal_dispersion       | 3.4             | 1.0   | 4.7    | 0.0  | 2616  | 1.0  |
| Mean_PPD                    | 11.0            | 1.7   | 13.2   | 0.0  | 2941  | 1.0  |
| <b>Brackishwater System</b> |                 |       |        |      |       |      |
| Intercept                   | -112.7          | 148.5 | 79.4   | 2.3  | 4257  | 1.0  |
| Year                        | 0.1             | 0.1   | 0.1    | 0.0  | 4256  | 1.0  |
| Climate Region              | 0.2             | 0.3   | 0.2    | 0.0  | 4251  | 1.0  |
| Year x Climate Region       |                 |       |        |      |       |      |
| Reciprocal_dispersion       | 0.7             | 0.3   | 1      | 0.0  | 3232  | 1.0  |
| Mean_PPD                    | 1.6             | 0.6   | 2.3    | 0.0  | 3022  | 1.0  |
| <b>Freshwater Systems</b>   |                 |       |        |      |       |      |
| Intercept                   | -219.0          | 125.7 | -56.0  | 1.9  | 4211  | 1.0  |
| Year                        | 0.1             | 0.1   | 0.2    | 0.0  | 4213  | 1.0  |
| Climate Region              | 0.5             | 0.2   | 0.8    | 0.0  | 4521  | 1.0  |
| Year x Climate Region       |                 |       |        |      |       |      |
| Reciprocal_dispersion       | 0.9             | 0.2   | 1.2    | 0.0  | 3613  | 1.0  |
| Mean_PPD                    | 5.1             | 1.8   | 7.3    | 0.0  | 3198  | 1    |
