# Supplementary material
Source: MDPI journal article supplement (https://www.mdpi.com/2073-4441/15/24/4288)
Supplement: s1 [file s1]

Archive with 2 entries (2 files):
- Supplemental_Table S1.xlsx
- water-2620461-supplementary.pdf
