# Supplementary material
Source: MDPI journal article supplement (https://www.mdpi.com/2073-4441/15/24/4288)
Supplement: s1 [file s1 › Supplemental_Table S1.xlsx]

## Sheet: Sheet1
No.	Authors	Article Title	year of production	Country/ Region	Climate region	Aquatic Ecoystem
1	Wynn-Edwards, C; King, R; Davidson, A; Wright, S; Nichols, PD; Wotherspoon, S; Kawaguchi, S; Virtue, P	Species-Specific Variations in the Nutritional Quality of Southern Ocean Phytoplankton in Response to Elevated pCO(2)	2014	Antarctica	Polar and Subpolar	Marine
2	Sackett, O; Petrou, K; Reedy, B; Hill, R; Doblin, M; Beardall, J; Ralph, P; Heraud, P	Snapshot prediction of carbon productivity, carbon and protein content in a Southern Ocean diatom using FTIR spectroscopy	2015	Antarctica	Polar and Subpolar	Marine
3	Sheehan, CE; Petrou, K	Dimethylated sulfur production in batch cultures of Southern Ocean phytoplankton	2020	Antarctica	Polar and Subpolar	Marine
4	Bolinesi, F; Saggiomo, M; Aceto, S; Cordone, A; Serino, E; Valoroso, MC; Mangoni, O	On the Relationship between a Novel Prorocentrum sp. and Colonial Phaeocystis antarctica under Iron and Vitamin B-12 Limitation: Ecological Implications for Antarctic Waters	2020	Antarctica	Polar and Subpolar	Marine
5	Kim, K; Park, J; Jo, N; Park, S; Yoo, H; Kim, J; Lee, SH	Monthly Variation in the Macromolecular Composition of Phytoplankton Communities at Jang Bogo Station, Terra Nova Bay, Ross Sea	2021	Antarctica	Polar and Subpolar	Marine
6	Garzio, LM; Steinberg, DK; Erickson, M; Ducklow, HW	Microzooplankton grazing along the Western Antarctic Peninsula	2013	Antarctica	Polar and Subpolar	Marine
7	Petrou, K; Trimborn, S; Rost, B; Ralph, PJ; Hassler, CS	The impact of iron limitation on the physiology of the Antarctic diatom Chaetoceros simplex	2014	Antarctica	Polar and Subpolar	Marine
8	Torstensson, A; Jimenez, C; Nilsson, AK; Wulff, A	Elevated temperature and decreased salinity both affect the biochemical composition of the Antarctic sea-ice diatom Nitzschia lecointei, but not increased pCO(2)	2019	Antarctica	Polar and Subpolar	Marine
9	Zeng, C; Zeng, T; Fischer, AM; Xu, HP	Fluorescence-Based Approach to Estimate the Chlorophyll-A Concentration of a Phytoplankton Bloom in Ardley Cove (Antarctica)	2017	Antarctica	Polar and Subpolar	Marine
10	Lee, SH; Joo, HM; Joo, H; Kim, BK; Song, HJ; Jeon, M; Kang, SH	Large contribution of small phytoplankton at Marian Cove, King George Island, Antarctica, based on long-term monitoring from 1996 to 2008	2015	Antarctica	Polar and Subpolar	Marine
11	Moutier, W; Thomalla, SJ; Bernard, S; Wind, G; Ryan-Keogh, TJ; Smith, ME	Evaluation of Chlorophyll-a and POC MODIS Aqua Products in the Southern Ocean	2019	Antarctica	Polar and Subpolar	Marine
12	Chen, SL; Meng, Y	Phytoplankton Blooms Expanding Further Than Previously Thought in the Ross Sea: A Remote Sensing Perspective	2022	Antarctica	Polar and Subpolar	Marine
13	Kim, H; Ducklow, HW; Abele, D; Barlett, EMR; Buma, AGJ; Meredith, MP; Rozema, PD; Schofield, OM; Venables, HJ; Schloss, IR	Inter-decadal variability of phytoplankton biomass along the coastal West Antarctic Peninsula	2018	Antarctica	Polar and Subpolar	Marine
14	Schofield, O; Brown, M; Kohut, J; Nardelli, S; Saba, G; Waite, N; Ducklow, H	Changes in the upper ocean mixed layer and phytoplankton productivity along the West Antarctic Peninsula	2018	Antarctica	Polar and Subpolar	Marine
15	Schofield, O; Saba, G; Coleman, K; Carvalho, F; Couto, N; Ducklow, H; Finkel, Z; Irwin, A; Kahl, A; Miles, T; Montes-Hugo, M; Stammerjohn, S; Waite, N	Decadal variability in coastal phytoplankton community composition in a changing West Antarctic Peninsula	2017	Antarctica	Polar and Subpolar	Marine
16	Jeon, M; Iriarte, JL; Yang, EJ; Kang, SH; Lee, Y; Joo, HM; Ahn, IY; Park, J; Min, GS; Park, SJ	Phytoplankton succession during a massive coastal diatom bloom at Marian Cove, King George Island, Antarctica	2021	Antarctica	Polar and Subpolar	Marine
17	Lee, SH; Kim, BK; Lim, YJ; Joo, H; Kang, JJ; Lee, D; Park, J; Ha, SY; Lee, SH	Small phytoplankton contribution to the standing stocks and the total primary production in the Amundsen Sea	2017	Antarctica	Polar and Subpolar	Marine
18	Montes-Hugo, MA; Yuan, XJ	Climate patterns and phytoplankton dynamics in Antarctic latent heat polynyas	2012	Antarctica	Polar and Subpolar	Marine
19	Schofield, O; Brown, M; Carvahlo, F; Couto, N; Crowley, M; Miles, T; Nardelli, S; Waite, N; Saba, G	Decadal trends in phytoplankton communities along a rapidly changing West Antarctic Peninsula	2017	Antarctica	Polar and Subpolar	Marine
20	Hernando, M; Schloss, IR; Malanga, G; Almandoz, GO; Ferreyra, GA; Aguiar, MB; Puntarulo, S	Effects of salinity changes on coastal Antarctic phytoplankton physiology and assemblage composition	2015	Antarctica	Polar and Subpolar	Marine
21	Mendes, CRB; de Souza, MS; Garcia, VMT; Leal, MC; Brotas, V; Garcia, CAE	Dynamics of phytoplankton communities during late summer around the tip of the Antarctic Peninsula	2012	Antarctica	Polar and Subpolar	Marine
22	Andrew, SM; Morell, HT; Strzepek, RF; Boyd, PW; Ellwood, MJ	Iron Availability Influences the Tolerance of Southern Ocean Phytoplankton to Warming and Elevated Irradiance	2019	Antarctica	Polar and Subpolar	Marine
23	Kim, BK; Jeon, M; Joo, HM; Kim, TW; Park, SJ; Park, J; Ha, SY	Impact of Freshwater Discharge on the Carbon Uptake Rate of Phytoplankton During Summer (January-February 2019) in Marian Cove, King George Island, Antarctica	2021	Antarctica	Polar and Subpolar	Marine
24	Schloss, IR; Abele, D; Moreau, S; Demers, S; Bers, AV; Gonzalez, O; Ferreyra, GA	Response of phytoplankton dynamics to 19-year (1991-2009) climate trends in Potter Cove (Antarctica)	2012	Antarctica	Polar and Subpolar	Marine
25	Feng, YB; Li, D; Zhao, J; Han, ZB; Pan, JM; Fan, GJ; Zhang, HS; Hu, J; Zhang, HF; Wu, JQ; Zhu, QH	Environmental drivers of phytoplankton crops and taxonomic composition in northeastern Antarctic Peninsula adjacent sea area	2022	Antarctica	Polar and Subpolar	Marine
26	Yilmaz, IN; Ergul, HA; Mavruk, S; Tas, S; Aker, HV; Yildiz, M; Ozturk, B	Coastal Plankton Assemblages in the Vicinity of Galindez Island and Neumayer Channel (Western Antarctic Peninsula) during the First Joint Turkish - Ukrainian Antarctic Research Expedition	2018	Antarctica	Polar and Subpolar	Marine
27	Kavanaugh, MT; Abdala, FN; Ducklow, H; Glover, D; Fraser, W; Martinson, D; Stammerjohn, S; Schofield, O; Doney, SC	Effect of continental shelf canyons on phytoplankton biomass and community composition along the western Antarctic Peninsula	2015	Antarctica	Polar and Subpolar	Marine
28	Kerkar, AU; Tripathy, SC; Pandi, SR	Bio-optical depiction of a polar ocean under global change: Exploring the regional absorption traits	2022	Antarctica	Polar and Subpolar	Marine
29	Alcaman-Arias, ME; Farias, L; Verdugo, J; Alarcon-Schumacher, T; Diez, B	Microbial activity during a coastal phytoplankton bloom on the Western Antarctic Peninsula in late summer	2018	Antarctica	Polar and Subpolar	marine
30	Rozema, PD; Venables, HJ; van de Poll, WH; Clarke, A; Meredith, MP; Buma, AGJ	Interannual variability in phytoplankton biomass and species composition in northern Marguerite Bay (West Antarctic Peninsula) is governed by both winter sea ice cover and summer stratification	2018	Antarctica	Polar and Subpolar	Marine
31	Andrew, SM; Strzepek, RF; Branson, O; Ellwood, MJ	Ocean acidification reduces the growth of two Southern Ocean phytoplankton	2022	Antarctica	Polar and Subpolar	Marine
32	Mendes, CRB; Tavano, VM; Leal, MC; de Souza, MS; Brotas, V; Garcia, CAE	Shifts in the dominance between diatoms and cryptophytes during three late summers in the Bransfield Strait (Antarctic Peninsula)	2013	Antarctica	Polar and Subpolar	Marine
33	Alarcon-Schumacher, T; Guajardo-Leiva, S; Anton, J; Diez, B	Elucidating Viral Communities During a Phytoplankton Bloom on the West Antarctic Peninsula	2019	Antarctica	Polar and Subpolar	Marine
34	Kim, BK; Jeon, M; Park, SJ; Kim, HC; Min, JO; Park, J; Ha, SY	Variability in the Carbon and Nitrogen Uptake Rates of Phytoplankton Associated With Wind Speed and Direction in the Marian Cove, Antarctica	2022	Antarctica	Polar and Subpolar	Marine
35	Weir, I; Fawcett, S; Smith, S; Walker, D; Bornman, T; Fietz, S	Winter biogenic silica and diatom distributions in the Indian sector of the Southern Ocean	2020	Antarctica	Polar and Subpolar	Marine
36	Trimborn, S; Hoppe, CJM; Taylor, BB; Bracher, A; Hassler, C	Physiological characteristics of open ocean and coastal phytoplankton communities of Western Antarctic Peninsula and Drake Passage waters	2015	Antarctica	Polar and Subpolar	Marine
37	Schloss, IR; Wasilowska, A; Dumont, D; Almandoz, GO; Hernando, MP; Michaud-Tremblay, CA; Saravia, L; Rzepecki, M; Monien, P; Monien, D; Kopczynska, EE; Bers, AV; Ferreyra, GA	On the phytoplankton bloom in coastal waters of southern King George Island (Antarctica) in January 2010: An exceptional feature?	2014	Antarctica	Polar and Subpolar	Marine
38	Joy-Warren, HL	The Importance of Spatial and Temporal Scales in Understanding Chlorophyll Variability in the Southern Ocean	2022	Antarctica	Polar and Subpolar	Marine
39	Vives, CR; Schallenberg, C; Strutton, PG; Westwood, KJ	Iron and light limitation of phytoplankton growth off East Antarctica	2022	Antarctica	Polar and Subpolar	Marine
40	Mangoni, O; Saggiomo, V; Bolinesi, F; Margiotta, F; Budillon, G; Cotroneo, Y; Misic, C; Rivaro, P; Saggiomo, M	Phytoplankton blooms during austral summer in the Ross Sea, Antarctica: Driving factors and trophic implications	2017	Antarctica	Polar and Subpolar	Marine
41	Ma, YX; Zhang, F; Yang, HZ; Lin, L; He, JF	Detection of phytoplankton blooms in Antarctic coastal water with an online mooring system during summer 2010/11	2013	Antarctica	Polar and Subpolar	Marine
42	Pillai, HUK; Anilkumar, N; Achuthankutty, CT; Mendes, CR; Sabu, P; Jayalakshmi, KV; Devi, CRA; Dessai, D; George, J; Pavithran, S; Devi, CKH; Tripathy, SC; Menon, NR	Planktonic food web structure at SSTF and PF in the Indian sector of the Southern Ocean during austral summer 2011	2018	Antarctica	Polar and Subpolar	Marine
43	Lee, DB; Choi, KH; Ha, HK; Yang, EJ; Lee, SH; Lee, S; Shin, HC	Mesozooplankton distribution patterns and grazing impacts of copepods and Euphausia crystallorophias in the Amundsen Sea, West Antarctica, during austral summer	2013	Antarctica	Polar and Subpolar	Marine
44	Conway, TM; Hoffmann, LJ; Breitbarth, E; Strzepek, RF; Wolff, EW	The Growth Response of Two Diatom Species to Atmospheric Dust from the Last Glacial Maximum	2016	Antarctica	Polar and Subpolar	Marine
45	Biggs, TEG; Alvarez-Fernandez, S; Evans, C; Mojica, KDA; Rozema, PD; Venables, HJ; Pond, DW; Brussaard, CPD	Antarctic phytoplankton community composition and size structure: importance of ice type and temperature as regulatory factors	2019	Antarctica	Polar and Subpolar	Marine
46	Yoshida, K; Seger, A; Corkill, M; Heil, P; Karsh, K; McMinn, A; Suzuki, K	Low Fe Availability for Photosynthesis of Sea-Ice Algae: Ex situ Incubation of the Ice Diatom Fragilariopsis cylindrus in Low-Fe Sea Ice Using an Ice Tank	2021	Antarctica	Polar and Subpolar	Marine
47	Behera, N; Swain, D; Sil, S	Effect of Antarctic sea ice on chlorophyll concentration in the Southern Ocean	2020	Antarctica	Polar and Subpolar	Marine
48	Takao, S; Hirawake, T; Wright, SW; Suzuki, K	Variations of net primary productivity and phytoplankton community composition in the Indian sector of the Southern Ocean as estimated from ocean color remote sensing data	2012	Antarctica	Polar and Subpolar	Marine
49	Boyd, PW	Physiology and iron modulate diverse responses of diatoms to a warming Southern Ocean	2019	Antarctica	Polar and Subpolar	Marine
50	Liu, Y; Debeljak, P; Rembauville, M; Blain, S; Obernosterer, I	Diatoms shape the biogeography of heterotrophic prokaryotes in early spring in the Southern Ocean	2019	Antarctica	Polar and Subpolar	Marine
51	Rigual-Hernandez, AS; Trull, TW; Bray, SG; Closset, I; Armand, LK	Seasonal dynamics in diatom and particulate export fluxes to the deep sea in the Australian sector of the southern Antarctic Zone	2015	Antarctica	Polar and Subpolar	Marine
52	Truzzi, C; Annibaldi, A; Finale, C; Libani, G; Romagnoli, T; Scarponi, G; Illuminati, S	Separation of micro-phytoplankton from inorganic particulate in Antarctic seawater (Ross Sea) for the determination of Cd, Pb and Cu: optimization of the analytical methodology	2015	Antarctica	Polar and Subpolar	Marine
53	Petrou, K; Kranz, SA; Trimborn, S; Hassler, CS; Ameijeiras, SB; Sackett, O; Ralph, PJ; Davidson, AT	Southern Ocean phytoplankton physiology in a changing climate	2017	Antarctica	Polar and Subpolar	Marine
54	Antoni, JS; Almandoz, GO; Ferrario, ME; Hernando, MP; Varela, DE; Rozema, PD; Buma, AGJ; Paparazzo, FE; Schloss, IR	Response of a natural Antarctic phytoplankton assemblage to changes in temperature and salinity	2020	Antarctica	Polar and Subpolar	Marine
55	Hernando, M; Varela, DE; Malanga, G; Almandoz, GO; Schloss, IR	Effects of climate-induced changes in temperature and salinity on phytoplankton physiology and stress responses in coastal Antarctica	2020	Antarctica	Polar and Subpolar	Marine
56	Crampton, JS; Cody, RD; Levy, R; Harwood, D; Mckay, R; Naish, TR	Southern Ocean phytoplankton turnover in response to stepwise Antarctic cooling over the past 15 million years	2016	Antarctica	Polar and Subpolar	Marine
57	Trimborn, S; Thoms, S; Bischof, K; Beszteri, S	Susceptibility of Two Southern Ocean Phytoplankton Key Species to Iron Limitation and High Light	2019	Antarctica	Polar and Subpolar	Marine
58	Trimborn, S; Brenneis, T; Hoppe, CJM; Laglera, LM; Norman, L; Santos-Echeandia, J; Volkner, C; Wolf-Gladrow, D; Hassler, CS	Iron sources alter the response of Southern Ocean phytoplankton to ocean acidification	2017	Antarctica	Polar and Subpolar	Marine
59	Kidston, M; Matear, R; Baird, ME	Phytoplankton growth in the Australian sector of the Southern Ocean, examined by optimising ecosystem model parameters	2013	Antarctica	Polar and Subpolar	Marine
60	Heiden, JP; Bischof, K; Trimborn, S	Light Intensity Modulates the Response of Two Antarctic Diatom Species to Ocean Acidification	2016	Antarctica	Polar and Subpolar	Marine
61	Wang, B; Chen, M; Chen, F; Jia, RM; Li, XP; Zheng, MF; Qiu, YS	Meteoric water promotes phytoplankton carbon fixation and iron uptake off the eastern tip of the Antarctic Peninsula (eAP)	2020	Antarctica	Polar and Subpolar	Marine
62	Joy-Warren, HL; Alderkamp, AC; van Dijken, GL; Jabre, L; Bertrand, EM; Baldonado, EN; Glickman, MW; Lewis, KM; Middag, R; Seyitmuhammedov, K; Lowry, KE; van de Poll, W; Arrigo, KR	Springtime phytoplankton responses to light and iron availability along the western Antarctic Peninsula	2022	Antarctica	Polar and Subpolar	Marine
63	Trimborn, S; Thoms, S; Karitter, P; Bischof, K	Ocean acidification and high irradiance stimulate the photo-physiological fitness, growth and carbon production of the Antarctic cryptophyte Geminigera cryophila	2019	Antarctica	Polar and Subpolar	Marine
64	Thomalla, SJ; Racault, MF; Swart, S; Monteiro, PMS	High-resolution view of the spring bloom initiation and net community production in the Subantarctic Southern Ocean using glider data	2015	Antarctica	Polar and Subpolar	Marine
65	Selz, V; Lowry, KE; Lewis, KM; Joy-Warren, HL; van de Poll, W; Nirmel, S; Tong, A; Arrigo, KR	Distribution of Phaeocystis antarctica-dominated sea ice algal communities and their potential to seed phytoplankton across the western Antarctic Peninsula in spring	2018	Antarctica	Polar and Subpolar	Marine
66	Hoppe, CJM; Hassler, CS; Payne, CD; Tortell, PD; Rost, B; Trimborn, S	Iron Limitation Modulates Ocean Acidification Effects on Southern Ocean Phytoplankton Communities	2013	Antarctica	Polar and Subpolar	Marine
67	Ducklow, HW; Schofield, O; Vernet, M; Stammerjohn, S; Erickson, M	Multiscale control of bacterial production by phytoplankton dynamics and sea ice along the western Antarctic Peninsula: A regional and decadal investigation	2012	Antarctica	Polar and Subpolar	Marine
68	Zhu, Z; Xu, K; Fu, FX; Spackeen, JL; Bronk, DA; Hutchins, DA	A comparative study of iron and temperature interactive effects on diatoms and Phaeocystis antarctica from the Ross Sea, Antarctica	2016	Antarctica	Polar and Subpolar	Marine
69	McMinn, A; Muller, MN; Martin, A; Ryan, KG	The Response of Antarctic Sea Ice Algae to Changes in pH and CO2	2014	Antarctica	Polar and Subpolar	Marine
70	Muller, MN; Trull, TW; Hallegraeff, GM	Differing responses of three Southern Ocean Emiliania huxleyi ecotypes to changing seawater carbonate chemistry	2015	Antarctica	Polar and Subpolar	Marine
71	Kwon, YS; La, HS; Jung, J; Lee, SH; Kim, TW; Kang, HW; Lee, S	Exploring the Roles of Iron and Irradiance in Dynamics of Diatoms and Phaeocystis in the Amundsen Sea Continental Shelf Water	2021	Antarctica	Polar and Subpolar	Marine
72	Coad, T; McMinn, A; Nomura, D; Martin, A	Effect of elevated CO2 concentration on microalgal communities in Antarctic pack ice	2016	Antarctica	Polar and Subpolar	Marine
73	Xu, D; Wang, YT; Fan, X; Wang, DS; Ye, NH; Zhang, XW; Mou, SL; Guan, Z; Zhuang, ZM	Long-Term Experiment on Physiological Responses to Synergetic Effects of Ocean Acidification and Photoperiod in the Antarctic Sea Ice Algae Chlamydomonas sp ICE-L	2014	Antarctica	Polar and Subpolar	Marine
74	Cisewski, B; Strass, VH	Acoustic insights into the zooplankton dynamics of the eastern Weddell Sea	2016	Antarctica	Polar and Subpolar	Marine
75	Muller, MN; Brandini, FP; Trull, TW; Hallegraeff, GM	Coccolith volume of the Southern Ocean coccolithophoreEmiliania huxleyias a possible indicator for palaeo-cell volume	2020	Antarctica	Polar and Subpolar	Marine
76	Sherwell, S; Kalra, I; Li, W; McKnight, DM; Priscu, JC; Morgan-Kiss, RM	Antarctic lake phytoplankton and bacteria from near-surface waters exhibit high sensitivity to climate-driven disturbance	2022	Antarctica	Polar and Subpolar	Freshwater
77	Kauko, HM; Hattermann, T; Ryan-Keogh, T; Singh, A; de Steur, L; Fransson, A; Chierici, M; Falkenhaug, T; Hallfredsson, EH; Bratbak, G; Tsagaraki, T; Berge, T; Zhou, Q; Moreau, S	Phenology and Environmental Control of Phytoplankton Blooms in the Kong Hakon VII Hav in the Southern Ocean	2021	Argentina	Polar and Subpolar	Marine
78	Moreau, S; Mostajir, B; Almandoz, GO; Demers, S; Hernando, M; Lemarchand, K; Lionard, M; Mercier, B; Roy, S; Schloss, IR; Thyssen, M; Ferreyra, GA	Effects of enhanced temperature and ultraviolet B radiation on a natural plankton community of the Beagle Channel (southern Argentina): a mesocosm study	2022	Argentina	Temperate	Marine
79	Masuda, T; Prasil, O; Villafane, VE; Valinas, MS; Inomura, K; Helbling, EW	Impact of Increased Nutrients and Lowered pH on Photosynthesis and Growth of Three Marine Phytoplankton Communities From the Coastal South West Atlantic (Patagonia, Argentina)	2021	Argentina	Temperate	Marine
80	Valinas, MS; Villafane, VE; Cabrerizo, MJ; Romero, CD; Helbling, EW	Global change effects on plankton community structure and trophic interactions in a Patagonian freshwater eutrophic system	2017	Argentina	Temperate	Freshwater
81	Villafane, VE; Valinas, MS; Cabrerizo, MJ; Helbling, EW	Physio-ecological responses of Patagonian coastal marine phytoplankton in a scenario of global change: Role of acidification, nutrients and solar UVR	2017	Argentina	Temperate	Brackish
82	Delgado, AL; Loisel, H; Jamet, C; Vantrepotte, V; Perillo, GME; Piccolo, MC	Seasonal and Inter-Annual Analysis of Chlorophyll-a and Inherent Optical Properties from Satellite Observations in the Inner and Mid-Shelves of the South of Buenos Aires Province (Argentina)	2015	Argentina	Temperate	marine
83	Villafane, VE; Banaszak, AT; Guendulain-Garcia, SD; Strauch, SM; Halac, SR; Helbling, EW	Influence of seasonal variables associated with climate change on photochemical diurnal cycles of marine phytoplankton from Patagonia (Argentina)	2013	Argentina	Temperate	Marine
84	Cabrerizo, MJ; Carrillo, P; Villafane, VE; Helbling, EW	Current and predicted global change impacts of UVR, temperature and nutrient inputs on photosynthesis and respiration of key marine phytoplankton groups	2014	Argentina	Temperate	Marine
85	Bermejo, P; Helbling, EW; Duran-Romero, C; Cabrerizo, MJ; Villafane, VE	Abiotic control of phytoplankton blooms in temperate coastal marine ecosystems: A case study in the South Atlantic Ocean	2018	Argentina	Temperate	Marine
86	Navarro, MAB; Modenutti, BE	Precipitation patterns, dissolved organic matter and changes in the plankton assemblage in Lake Escondido (Patagonia, Argentina)	2012	Argentina	Temperate	Freshwater
87	Cano, MG; Casco, MA; Claps, MC	Epipelon dynamics in a shallow lake through a turbid-and a clear- water regime	2016	Argentina	Temperate	Freshwater
88	Abbate, MCL; Molinero, JC; Guinder, VA; Perillo, GME; Freije, RH; Sommer, U; Spetter, CV; Marcovecchio, JE	Time-varying environmental control of phytoplankton in a changing estuarine system	2017	Argentina	Temperate	Brackish
89	Vizzo, JI; Cabrerizo, MJ; Helbling, EW; Villafane, VE	Extreme and gradual rainfall effects on winter and summer estuarine phytoplankton communities from Patagonia (Argentina)	2021	Argentina	Temperate	Brackish
90	Minasyan, A; Christophoridis, C; Wilson, AE; Zervou, SK; Kaloudis, T; Hiskia, A	Diversity of cyanobacteria and the presence of cyanotoxins in the epilimnion of Lake Yerevan (Armenia)	2018	Armenia	Temperate	Freshwater
91	Tran, DV; Gabric, A; Cropp, R	Interannual variability in chlorophyll-a on the southern Queensland continental shelf and its relationship to ENSO	2015	Australia	Substropical	Marine
92	Soja-Wozniak, M; Laiolo, L; Baird, ME; Matear, R; Clementson, L; Schroeder, T; Doblin, MA; Suthers, IM	Effect of phytoplankton community size structure on remote-sensing refiectance and chlorophyll a products	2019	Australia	Substropical	Marine
93	Laiolo, L; Matear, R; Soja-Woiniak, M; Suggett, DJ; Hughes, DJ; Baird, ME; Doblin, MA	Modelling the impact of phytoplankton cell size and abundance on inherent optical properties (IOPs) and a remotely sensed chlorophyll-a product	2021	Australia	Substropical	Marine
94	Laiolo, L; McInnes, AS; Matear, R; Doblin, MA	Key Drivers of Seasonal Plankton Dynamics in Cyclonic and Anticyclonic Eddies off East Australia	2016	Australia	Substropical	Marine
95	Liu, DY; Zhou, CR; Keesing, JK; Serrano, O; Werner, A; Fang, Y; Chen, YJ; Masque, P; Kinloch, J; Sadekov, A; Du, Y	Wildfires enhance phytoplankton production in tropical oceans	2022	Australia	Substropical	Marine
96	Smith, LV; McMinn, A; Martin, A; Nicol, S; Bowie, AR; Lannuzel, D; van der Merwe, P	Preliminary investigation into the stimulation of phytoplankton photophysiology and growth by whale faeces	2013	Australia	Substropical	Marine
97	Shute, A; Kampf, J; Doubell, M; Rodriguez, AR; Moller, L; Baring, R; Newman, M	Variability of surface and subsurface phytoplankton blooms in a seasonal coastal upwelling system	2022	Australia	Substropical	Marine
98	Lines, T; Orr, P; Beardall, J	Elevated co(2) has Differential Effects on Five Species of Microalgae from a Subtropical Freshwater Lake: Possible Implications for Phytoplankton Species Composition(1)	2020	Australia	Substropical	Freshwater
99	Prentice, MJ; O'Brien, KR; Hamilton, DP; Burford, MA	High- and low-affinity phosphate uptake and its effect on phytoplankton dominance in a phosphate-depauperate lake	2015	Australia	Substropical	Freshwater
100	Qu, PP; Fu, FX; Kling, JD; Huh, M; Wang, XW; Hutchins, DA	Distinct Responses of the Nitrogen-Fixing Marine Cyanobacterium Trichodesmium to a Thermally Variable Environment as a Function of Phosphorus Availability	2019	Australia	Subtropical	Brackish
101	Buchanan, PJ; Swadling, KM; Eriksen, RS; Wild-Allen, K	New evidence links changing shelf phytoplankton communities to boundary currents in southeast Tasmania	2014	Australia	Temperate	Marine
102	Sinoir, M; Bowie, AR; Mongin, M; Butler, ECV; Hassler, CS	Zinc requirement for two phytoplankton strains of the Tasman Sea	2017	Australia	Temperate	Marine
103	Hughes, DJ; Varkey, D; Doblin, MA; Ingleton, T; Mcinnes, A; Ralph, PJ; van Dongen-Vogels, V; Suggett, DJ	Impact of nitrogen availability upon the electron requirement for carbon fixation in Australian coastal phytoplankton communities	2018	Australia	Temperate	Marine
104	Roberts, SD; Van Ruth, PD; Wilkinson, C; Bastianello, SS; Bansemer, MS	Marine Heatwave, Harmful Algae Blooms and an Extensive Fish Kill Event During 2013 in South Australia	2019	Australia	Temperate	Marine
105	Ajani, PA; Petrou, K; Larsson, ME; Nielsen, DA; Burke, J; Murray, SA	Phenotypic trait variability as an indication of adaptive capacity in a cosmopolitan marine diatom	2021	Australia	Temperate	Marine
106	Larsson, ME; Ajani, PA; Rubio, AM; Guise, K; McPherson, RG; Brett, SJ; Davies, KP; Doblin, MA	Long-term perspective on the relationship between phytoplankton and nutrient concentrations in a southeastern Australian estuary	2016	Australia	Temperate	Brackish
107	Sanderson, BG; Redden, AM; Evans, K	Grazing Constants are Not Constant: Microzooplankton Grazing is a Function of Phytoplankton Production in an Australian Lagoon	2012	Australia	Temperate	Brackish
108	Ajani, PA; Larsson, ME; Woodcock, S; Rubio, A; Farrell, H; Brett, S; Murray, SA	Bloom drivers of the potentially harmful dinoflagellate Prorocentrum minimum (Pavillard) Schiller in a south temperate Australian estuary	2018	Australia	Temperate	Brackish
109	Nielsen, LT; Hallegraeff, GM; Wright, SW; Hansen, PJ	Effects of experimental seawater acidification on an estuarine plankton community	2012	Australia	Temperate	Brackish
110	Moore, LR; Huang, TT; Ostrowski, M; Mazard, S; Kumar, SS; Gamage, HKAH; Brown, MV; Messer, LF; Seymour, JR; Paulseno, IT	Unicellular Cyanobacteria Are Important Components of Phytoplankton Communities in Australia's Northern Oceanic Ecoregions	2019	Australia	Tropical	Marine
111	Rahlff, J; Khodami, S; Voskuhl, L; Humphreys, MP; Stolle, C; Arbizu, PM; Wurl, O; Ribas-Ribas, M	Short-term responses to ocean acidification: effects on relative abundance of eukaryotic plankton from the tropical Timor Sea	2020	Australia	Tropical	Marine
112	Clementson, LA; Richardson, AJ; Rochester, WA; Oubelkheir, K; Liu, BQ; D'Sa, EJ; Gusmao, LFM; Ajani, P; Schroeder, T; Ford, PW; Burford, MA; Saeck, E; Steven, ADL	Effect of a Once in 100-Year Flood on a Subtropical Coastal Phytoplankton Community	2021	Australia	Tropical	Marine
113	Kehoe, M; O'Brien, KR; Grinham, A; Burford, MA	Primary production of lake phytoplankton, dominated by the cyanobacterium Cylindrospermopsis raciborskii, in response to irradiance and temperature	2015	Australia	Tropical	Freshwater
114	Qu, PP; Fu, FX; Kling, JD; Huh, M; Wang, XW; Hutchins, DA	Distinct Responses of the Nitrogen-Fixing Marine Cyanobacterium Trichodesmium to a Thermally Variable Environment as a Function of Phosphorus Availability	2019	Australia	Tropical	Brackish
115	Qu, PP; Fu, FX; Kling, JD; Huh, M; Wang, XW; Hutchins, DA	Distinct Responses of the Nitrogen-Fixing Marine Cyanobacterium Trichodesmium to a Thermally Variable Environment as a Function of Phosphorus Availability	2019	Australia	Tropical	Brackish
116	Vad, CF; Schneider, C; Lukic, D; Horvath, Z; Kainz, MJ; Stibor, H; Ptacnik, R	Grazing resistance and poor food quality of a widespread mixotroph impair zooplankton secondary production	2020	Austria	Temperate	Freshwater
117	Bergkemper, V; Weisse, T	Do current European lake monitoring programmes reliably estimate phytoplankton community changes?	2018	Austria	Temperate	Freshwater
118	Bergkemper, V; Weisse, T	Phytoplankton response to the summer 2015 heat wave - a case study from prealpine Lake Mondsee, Austria	2015	Austria	Temperate	Freshwater
119	Wieliczko, AD; Crossetti, LO; Cavalcanti, JR; Hessel, MNS; da Motta-Marques, D; Rodrigues, LR	Meteorological drivers and ENSO influence on phytoplankton biomass dynamics in a shallow subtropical lake	2021	Brazil	Substropical	Freshwater
120	Fuentes, EV; Petrucio, MM	Water level decrease and increased water stability promotes phytoplankton growth in a mesotrophic subtropical lake	2015	Brazil	Substropical	Freshwater
121	Picapedra, PHS; Fernandes, C; Taborda, J; Baurrigartneri, G; Sanches, PV	A long-term study on zooplankton in two contrasting cascade reservoirs (Iguacu River, Brazil): effects of inter-annual, seasonal, and environmental factors	2020	Brazil	Substropical	Freshwater
122	Wojciechowski, J; Fernandes, LF; Fonseca, FVB	Morpho-physiological responses of a subtropical strain of Cylindrospermopsis raciborskii (Cyanobacteria) to different light intensities	2016	Brazil	Substropical	Freshwater
123	Araujo, M; Noriega, C; Hounsou-gbo, GA; Veleda, D; Araujo, J; Bruto, L; Feitosa, F; Flores-Montes, M; Lefevre, N; Melo, P; Otsuka, A; Travassos, K; Schwamborn, R; Neumann-Leitao, S	A Synoptic Assessment of the Amazon River-Ocean Continuum during Boreal Autumn: From Physics to Plankton Communities and Carbon Flux	2017	Brazil	Substropical	Brackish
124	Islabao, CA; Odebrecht, C	Influence of salinity on the growth of Akashiwo sanguinea and Prorocentrum micans (Dinophyta) under acclimated conditions and abrupt changes	2015	Brazil	Temperate	Marine
125	Campelo, RPD; Bonou, FK; de Melo, M; Diaz, XFG; Bezerra, LEA; Neumann-Leitao, S	Zooplankton biomass around marine protected islands in the tropical Atlantic Ocean	2019	Brazil	Tropical	Marine
126	Conroy, BJ; Steinberg, DK; Stukel, MR; Goes, JI; Coles, VJ	Meso- and microzooplankton grazing in the Amazon River plume and western tropical North Atlantic	2016	Brazil	Tropical	Marine
127	Aranha, TRBT; Martinez, JM; Souza, EP; Barros, MUG; Martins, ESPR	Remote Analysis of the Chlorophyll-a Concentration Using Sentinel-2 MSI Images in a Semiarid Environment in Northeastern Brazil	2022	Brazil	Tropical	Freshwater
128	Machado, KB; Bini, LM; Melo, AS; de Andrade, AT; de Almeida, MF; Carvalho, P; Teresa, FB; Roque, FD; Bortolini, JC; Padial, AA; Vieira, LCG; Dala-Corte, RB; Siqueira, T; Juen, L; Dias, MS; Gama, WA; Martins, RT; Nabout, JC	Functional and taxonomic diversities are better early indicators of eutrophication than composition of freshwater phytoplankton	2022	Brazil	Tropical	Freshwater
129	Curtarelli, MP; Ogashawara, I; Alcantara, EH; Stech, JL	Coupling remote sensing bio-optical and three-dimensional hydrodynamic modeling to study the phytoplankton dynamics in a tropical hydroelectric reservoir	2015	Brazil	Tropical	Freshwater
130	Josue, IIP; Cardoso, SJ; Miranda, M; Mucci, M; Ger, KA; Roland, F; Marinho, MM	Cyanobacteria dominance drives zooplankton functional dispersion	2019	Brazil	Tropical	Freshwater
131	Silva, NBA; Flores-Montes, M; Guennes, M; Borges, G; Noriega, C; Araujo, M; Silva-Cunha, MDG	Phytoplankton cell size in an urban tropical estuarine system in Northeast Brazil	2021	Brazil	Tropical	Brackish
132	Barroso, HD; Tavares, TCL; Soares, MD; Garcia, TM; Rozendo, B; Vieira, ASC; Viana, PB; Pontes, TM; Ferreira, TJT; Pereira, J; Schettini, CAF; Santaella, ST	Intra-annual variability of phytoplankton biomass and nutrients in a tropical estuary during a severe drought	2018	Brazil	Tropical	Brackish
133	Mesquita, MCB; Prestes, ACC; Gomes, AMA; Marinho, MM	Direct Effects of Temperature on Growth of Different Tropical Phytoplankton Species	2019	Brazil	Tropical	Brackish
134	Zhuang, YP; Jin, HY; Li, HL; Chen, JF; Lin, L; Bai, YC; Ji, ZQ; Zhang, Y; Gu, F	Pacific inflow control on phytoplankton community in the Eastern Chukchi Shelf during summer	2016	Canada	Polar and Subpolar	Marine
135	Thompson, MS; Wrona, FJ; Prowse, TD	Shifts in Plankton, Nutrient and Light Relationships in Small Tundra Lakes Caused by Localized Permafrost Thaw	2012	Canada	Polar and Subpolar	Freshwater
136	Vucic, JM; Gray, DK; Cohen, RS; Syed, M; Murdoch, AD; Sharma, S	Changes in water quality related to permafrost thaw may significantly impact zooplankton in small Arctic lakes	2020	Canada	Polar and Subpolar	Freshwater
137	Hilborn, A; Costa, M	Applications of DINEOF to Satellite-Derived Chlorophyll-a from a Productive Coastal Region	2018	Canada	Temperate	Marine
138	Devred, E; Hilborn, A; den Heyer, CE	Enhanced chlorophyll-a concentration in the wake of Sable Island, eastern Canada, revealed by two decades of satellite observations: a response to grey seal population dynamics?	2021	Canada	Temperate	Marine
139	Liu, XH; Devred, E; Johnson, C	Remote Sensing of Phytoplankton Size Class in Northwest Atlantic from 1998 to 2016: Bio-Optical Algorithms Comparison and Application	2018	Canada	Temperate	Marine
140	Ross, T; Craig, SE; Comeau, A; Davis, R; Dever, M; Beck, M	Blooms and subsurface phytoplankton layers on the Scotian Shelf: Insights from profiling gliders	2017	Canada	Temperate	Marine
141	Simo-Matchim, AG; Gosselin, M; Blais, M; Gratton, Y; Tremblay, JE	Seasonal variations of phytoplankton dynamics in Nunatsiavut fjords (Labrador, Canada) and their relationships with environmental conditions	2016	Canada	Temperate	Marine
142	Vogt, RJ; Sharma, S; Leavitt, PR	Decadal regulation of phytoplankton abundance and water clarity in a large continental reservoir by climatic, hydrologic and trophic processes	2015	Canada	Temperate	Freshwater
143	Paltsev, A; Creed, IF	Multi-decadal changes in phytoplankton biomass in northern temperate lakes as seen through the prism of landscape properties	2022	Canada	Temperate	Freshwater
144	Paltsev, A; Creed, IF	Are Northern Lakes in Relatively Intact Temperate Forests Showing Signs of Increasing Phytoplankton Biomass?	2021	Canada	Temperate	Freshwater
145	Rattan, KJ	Comparative analyses of physiological assays and chlorophyll a variable fluorescence parameters: investigating the importance of phosphorus availability in oligotrophic and eutrophic freshwater systems	2017	Canada	Temperate	Freshwater
146	Senar, OE; Creed, IF; Trick, CG	Lake browning may fuel phytoplankton biomass and trigger shifts in phytoplankton communities in temperate lakes	2021	Canada	Temperate	Freshwater
147	Symons, CC; Arnott, SE; Sweetman, JN	Grazing rates of crustacean zooplankton communities on intact phytoplankton communities in Canadian Subarctic lakes and ponds	2012	Canada	Temperate	Freshwater
148	Harrison, JW; Howell, ET; Watson, SB; Smith, REH	Improved estimates of phytoplankton community composition based on in situ spectral fluorescence: use of ordination and field-derived norm spectra for the bbe FluoroProbe	2016	Canada	Temperate	Freshwater
149	Przytulska, A; Bartosiewicz, M; Vincent, WF	Increased risk of cyanobacterial blooms in northern high-latitude lakes through climate warming and phosphorus enrichment	2017	Canada	Temperate	Freshwater
150	Abirhire, O; Hunter, K; Davies, JM; Guo, XL; de Boer, D; Hudson, J	An examination of the long-term relationship between hydrologic variables and summer algal biomass in a large Prairie reservoir	2018	Canada	Temperate	Freshwater
151	Deshpande, BN; Tremblay, R; Pienitz, R; Vincent, WF	Sedimentary pigments as indicators of cyanobacterial dynamics in a hypereutrophic lake	2014	Canada	Temperate	Freshwater
152	Planas, D; Paquet, S	Importance of climate change-physical forcing on the increase of cyanobacterial blooms in a small, stratified lake	2016	Canada	Temperate	Freshwater
153	Soontiens, N; Binding, C; Fortin, V; Mackay, M; Rao, YR	Algal bloom transport in Lake Erie using remote sensing and hydrodynamic modelling: Sensitivity to buoyancy velocity and initial vertical distribution	2019	Canada	Temperate	Freshwater
154	Musial, KA; Prater, C; Watson, SB; Frost, PC; Xenopoulos, MA	Lipid bound phosphorus in the seston of Lake Erie and its tributaries and its use as an indicator of algal P-limitation	2021	Canada	Temperate	Freshwater
155	Karmakar, M; Leavitt, PR; Cumming, BF	Enhanced algal abundance in northwest Ontario (Canada) lakes during the warmer early-to mid-Holocene period	2015	Canada	Temperate	Freshwater
156	Edgar, RE; Morris, PF; Rozmarynowycz, MJ; D'souza, NA; Moniruzzaman, M; Bourbonniere, RA; Bullerjahn, GS; Phuntumart, V; Wilhelm, SW; McKay, RML	Adaptations to photoautotrophy associated with seasonal ice cover in a large lake revealed by metatranscriptome analysis of a winter diatom bloom	2016	Canada	Temperate	Freshwater
157	Molot, LA; Higgins, SN; Schiff, SL; Venkiteswaran, JJ; Paterson, MJ; Baulch, HM	Phosphorus-only fertilization rapidly initiates large nitrogen-fixing cyanobacteria blooms in two oligotrophic lakes	2021	Canada	Temperate	Freshwater
158	Carrick, HJ; Butts, E; Daniels, D; Fehringer, M; Frazier, C; Fahnenstiel, GL; Pothoven, S; Vanderploeg, HA	Variation in the abundance of pico, nano, and microplankton in Lake Michigan: Historic and basin-wide comparisons	2015	Canada	Temperate	Freshwater
159	Paquette, C; Beisner, BE	Interaction effects of zooplankton and CO2 on phytoplankton communities and the deep chlorophyll maximum	2018	Canada	Temperate	Freshwater
160	Belisle, BS; Steffen, MM; Pound, HL; Watson, SB; DeBruyn, JM; Bourbonniere, RA; Boyer, GL; Wilhelm, SW	Urea in Lake Erie: Organic nutrient sources as potentially important drivers of phytoplankton biomass	2016	Canada	Temperate	Freshwater
161	Przytulska, A; Bartosiewicz, M; Rautio, M; Dufresne, F; Vincent, WF	Climate Effects on High Latitude Daphnia via Food Quality and Thresholds	2015	Canada	Temperate	Freshwater
162	Balasubramaniam, K; Ruhland, KM; Smol, JP	A diatom-based paleolimnological re-assessment of previously polymictic Lake Opinicon, Ontario (Canada): crossing an ecological threshold in response to warming over the past 25 years	2022	Canada	Temperate	Freshwater
163	Karmakar, M; Leavitt, PR; Patoine, A	Effects of Bridge Construction and Wastewater Effluent on Phytoplankton Abundance and Sediment Geochemistry in an Atlantic Temperate Coastal Bay Since 1930	2018	Canada	Temperate	Brackish
164	Patoine, A; Karmakar, M; Kurek, J	Differential Impacts of Climate and Land-use on Twentieth-century Phytoplankton Composition among and within Two Temperate Coastal Estuaries of Atlantic Canada	2022	Canada	Temperate	Brackish
165	Ady, FD; Patoine, A	Impacts of land use and climate variability on algal communities since similar to 1850 CE in an oligotrophic estuary in northeastern New Brunswick, Canada	2016	Canada	Temperate	Brackish
166	Yezhova, Y; Capelle, D; Stainton, M; Papakyriakou, T	Carbon fixation by the phytoplankton community across Lake Winnipeg	2021	Canada	Temperate	Freshwater
167	Engel, A; Borchard, C; Loginova, A; Meyer, J; Hauss, H; Kiko, R	Effects of varied nitrate and phosphate supply on polysaccharidic and proteinaceous gel particle production during tropical phytoplankton bloom experiments	2015	Cape Verde	Tropical	Marine
168	Iriarte, JL; Leon-Munoz, J; Marce, R; Clement, A; Lara, C	Influence of seasonal freshwater streamflow regimes on phytoplankton blooms in a Patagonian fjord	2017	Chile	Temperate	Marine
169	Labbe-Ibanez, P; Iriarte, JL; Pantoja, S	Response of microphytoplankton to the addition of nitrate and silicic acid in Chilean Patagonian fjords	2015	Chile	Temperate	Marine
170	Corredor-Acosta, A; Morales, CE; Rodriguez-Santana, A; Anabalon, V; Valencia, LP; Hormazabal, S	The Influence of Diapycnal Nutrient Fluxes on Phytoplankton Size Distribution in an Area of Intense Mesoscale and Submesoscale Activity off Concepcion, Chile	2020	Chile	Temperate	Marine
171	Anabalon, V; Morales, CE; Gonzalez, HE; Menschel, E; Schneider, W; Hormazabal, S; Valencia, L; Escribano, R	Micro-phytoplankton community structure in the coastal upwelling zone off Concepcion (central Chile): Annual and inter-annual fluctuations in a highly dynamic environment	2016	Chile	Temperate	Marine
172	Corredor-Acosta, A; Morales, CE; Hormazabal, S; Andrade, I; Correa-Ramirez, MA	Phytoplankton phenology in the coastal upwelling region off central-southern Chile (35 degrees S-38 degrees S): Time-space variability, coupling to environmental factors, and sources of uncertainty in the estimates	2015	Chile	Temperate	Marine
173	Ferreira, A; Sa, C; Silva, N; Beltran, C; Dias, AM; Brito, AC	Phytoplankton community dynamics in a coastal bay under upwelling influence (Central Chile)	2020	Chile	Temperate	Marine
174	Mardones, JI; Muller, MN; Hallegraeff, GM	Toxic dinoflagellate blooms of Alexandrium catenella in Chilean fjords: a resilient winner from climate change	2016	Chile	Temperate	Marine
175	Zhang, CY; Hong, HS	Interannual variability of remotely sensed chlorophyll a during an autumn monsoon transitional period in the Taiwan Strait	2014	China	Substropical	Marine
176	Zhang, SW; Xie, LL; Hou, YJ; Zhao, H; Qi, YQ; Yi, XF	Tropical storm-induced turbulent mixing and chlorophyll-a enhancement in the continental shelf southeast of Hainan Island	2014	China	Substropical	Marine
177	Wang, HH; Song, SH; Qi, YZ	A comparative study of phytoneuston and the phytoplankton community structure in Daya Bay, South China Sea	2014	China	Substropical	Marine
178	Dang, XY; Bai, Y; Gong, F; Chen, XY; Zhu, QK; Huang, HQ; He, XQ	Different Responses of Phytoplankton to the ENSO in Two Upwelling Systems of the South China Sea	2022	China	Substropical	Marine
179	Goncalves-Araujo, R; de Souza, MS; Mendes, CRB; Tavano, VM; Garcia, CAE	Seasonal change of phytoplankton (spring vs. summer) in the southern Patagonian shelf	2016	China	Temperate	Marine
180	Yang, Y; Sun, XX; Zhu, ML; Luo, X; Zheng, S	Estimating the carbon biomass of marine net phytoplankton from abundance based on samples from China seas	2016	China	Temperate	Marine
181	Fu, YZ; Xu, SG; Liu, JW	Temporal-spatial variations and developing trends of Chlorophyll-a in the Bohai Sea, China	2016	China	Temperate	Marine
182	Thangaraj, S; Liu, HJ; Kim, IN; Sun, J	Acclimation traits determine the macromolecular basis of harmful dinoflagellate Alexandrium minutum in response to changing climate conditions	2022	China	Temperate	Marine
183	Hao, ZZ; Pan, DL; Gong, F; He, XQ; Wang, DF	The Re-analysis for satellite retrieved Chlorophyll-a in East China Sea	2017	China	Temperate	Marine
184	Hao, Q; Chai, F; Xiu, P; Bai, Y; Chen, JF; Liu, CG; Le, FF; Zhou, F	Spatial and temporal variation in chlorophyll a concentration in the Eastern China Seas based on a locally modified satellite dataset	2019	China	Temperate	Marine
185	Kong, CE; Yoo, S; Jang, CJ	East China Sea ecosystem under multiple stressors: Heterogeneous responses in the sea surface chlorophyll-a	2019	China	Temperate	Marine
186	Sun, XR; Shen, F; Brewin, RJW; Liu, DY; Tang, RG	Twenty-Year Variations in Satellite-Derived Chlorophyll-a and Phytoplankton Size in the Bohai Sea and Yellow Sea	2019	China	Temperate	Marine
187	Wu, YM; Zhu, HP; Dang, XY; Cheng, TF; Yang, SL; Wang, L; Huang, LM; Cui, XS	Spatial-Temporal Change of Phytoplankton Biomass in the East China Sea with MODIS Data	2021	China	Temperate	Marine
188	Jang, HK; Kang, JJ; Lee, JH; Kim, M; Ahn, SH; Jeong, JY; Yun, MS; Han, IS; Lee, SH	Recent Primary Production and Small Phytoplankton Contribution in the Yellow Sea during the Summer in 2016	2018	China	Temperate	Marine
189	Zhao, H; Shao, JC; Han, GQ; Yang, DZ; Lv, JH	Influence of Typhoon Matsa on Phytoplankton Chlorophyll-a off East China	2015	China	Temperate	Marine
190	Zhang, HL; Qiu, ZF; Sun, DY; Wang, SQ; He, YJ	Seasonal and Interannual Variability of Satellite-Derived Chlorophyll-a (2000-2012) in the Bohai Sea, China	2017	China	Temperate	Marine
191	Park, KW; Oh, HJ; Moon, SY; Yoo, MH; Youn, SH	Effects of Miniaturization of the Summer Phytoplankton Community on the Marine Ecosystem in the Northern East China Sea	2022	China	Temperate	Marine
192	Liu, X; Xiao, WP; Landry, MR; Chiang, KP; Wang, L; Huang, BQ	Responses of Phytoplankton Communities to Environmental Variability in the East China Sea	2016	China	Temperate	Marine
193	Jiang, ZB; Chen, JF; Gao, YX; Zhai, HC; Jin, HY; Zhou, F; Shou, L; Yan, XJ; Chen, QZ	Regulation of Spatial Changes in Phytoplankton Community by Water Column Stability and Nutrients in the Southern Yellow Sea	2019	China	Temperate	Marine
194	Tong, Y; Feng, L; Zhao, D; Xu, W; Zheng, CM	Remote sensing of chlorophyll-a concentrations in coastal oceans of the Greater Bay Area in China: Algorithm development and long-term changes	2022	China	Temperate	Marine
195	Fu, TT; Chen, BH; Ji, WD; Chen, WF; Lin, H; Luo, Y; Wang, K	Size Structure of Phytoplankton Community and its Response to Environmental Factors in Spring and Summer in Xiamen Bay, China	2016	China	Temperate	Marine
196	Xu, Y; Wu, Y; Xiu, P; Ge, JZ; Zhang, J	Unraveling environmental drivers of chlorophyll seasonal and interannual variability in the East China Sea	2022	China	Temperate	Marine
197	He, H; Luo, XG; Jin, H; Gu, J; Jeppesen, E; Liu, ZW; Li, KY	Effects of Exposed Artificial Substrate on the Competition between Phytoplankton and Benthic Algae: Implications for Shallow Lake Restoration	2017	China	Temperate	Marine
198	Zhang, C; Shi, ZB; Zhao, JR; Zhang, Y; Yu, Y; Mu, YC; Yao, XH; Feng, LM; Zhang, F; Chen, YJ; Liu, XH; Shi, JH; Gao, HW	Impact of air emissions from shipping on marine phytoplankton growth	2021	China	Temperate	Marine
199	Kim, Y; Youn, SH; Oh, HJ; Kang, JJ; Lee, JH; Lee, D; Kim, K; Jang, HK; Lee, J; Lee, SH	Spatiotemporal Variation in Phytoplankton Community Driven by Environmental Factors in the Northern East China Sea	2020	China	Temperate	Marine
200	Zhang, JW; Chen, YH; Ren, XY; Patil, V; Sun, L; Li, XS; Liang, JR; Zhang, J; Gao, YH; Chen, CP	Distribution of phytoplankton in the East China Sea and the southern Yellow Sea in spring in relation to environmental variables and dimethylsulfide compounds	2022	China	Temperate	Marine
201	Wang, SQ; Xiao, C; Ishizaka, J; Qiu, ZF; Sun, DY; Xu, Q; Zhu, YL; Huan, Y; Watanabe, Y	Statistical approach for the retrieval of phytoplankton community structures from in situ fluorescence measurements	2016	China	Temperate	Marine
202	Sun, DY; Huan, Y; Wang, SQ; Qiu, ZF; Ling, ZB; Mao, ZH; He, YJ	Remote sensing of spatial and temporal patterns of phytoplankton assemblages in the Bohai Sea, Yellow Sea, and east China sea	2019	China	Temperate	Marine
203	Ou, GY; Wang, H; Si, RR; Guan, WC	The dinoflagellate Akashiwo sanguinea will benefit from future climate change: The interactive effects of ocean acidification, warming and high irradiance on photophysiology and hemolytic activity	2017	China	Temperate	Marine
204	Abate, R; Gao, YH; Chen, CP; Liang, JR; Mu, WH; Kifile, D; Chen, YH	Decadal variations in diatoms and dinoflagellates on the inner shelf of the East China Sea, China	2017	China	Temperate	Marine
205	Joo, H; Lee, D; Son, SH; Lee, SH	Annual New Production of Phytoplankton Estimated from MODIS-Derived Nitrate Concentration in the East/Japan Sea	2018	China	Temperate	Marine
206	Wu, XJ; Gao, G; Giordano, M; Gao, KS	Growth and photosynthesis of a diatom grown under elevated CO2 in the presence of solar UV radiation	2022	China	Temperate	Marine
207	Sun, Y; Youn, SH; Kim, Y; Kang, JJ; Lee, D; Kim, K; Jang, HK; Jo, N; Yun, MS; Song, SK; Lee, SH	Interannual Variation in Phytoplankton Community Driven by Environmental Factors in the Northern East China Sea	2022	China	Temperate	Marine
208	Li, XF; Roevros, N; Dehairs, F; Chou, L	Biological responses of the marine diatom Chaetoceros socialis to changing environmental conditions: A laboratory experiment	2017	China	Temperate	Marine
209	Hu, ZX; Mulholland, MR; Xu, N; Duan, SS	Effects of temperature, irradiance and pCO(2) on the growth and nitrogen utilization of Prorocentrum donghaiense	2016	China	Temperate	Marine
210	Kelly, KJ; Fu, FX; Jiang, XW; Li, H; Xu, D; Yang, NN; DeMers, MA; Kling, JD; Gao, KS; Ye, NIH; Hutchins, DA	Interactions Between Ultraviolet B Radiation, Warming, and Changing Nitrogen Source May Reduce the Accumulation of Toxic Pseudo-nitzschia multiseries Biomass in Future Coastal Oceans		China	Temperate	Marine
211	Li, B; Yang, GS; Wan, RR; Xu, LG	Chlorophyll a variations and responses to environmental stressors along hydrological connectivity gradients: Insights from a large floodplain lake	2022	China	Temperate	Freshwater
212	Xu, H; Paerl, HW; Zhu, GW; Qin, BQ; Hall, NS; Zhu, MY	Long-term nutrient trends and harmful cyanobacterial bloom potential in hypertrophic Lake Taihu, China	2017	China	Temperate	Freshwater
213	Huang, JC; Gao, JF; Mooij, WM; Hormann, G; Fohrer, N	A Comparison of Three Approaches to Predict Phytoplankton Biomass in Gonghu Bay of Lake Taihu	2014	China	Temperate	Freshwater
214	Deng, JM; Salmaso, N; Jeppesen, E; Qin, BQ; Zhang, YL	The relative importance of weather and nutrients determining phytoplankton assemblages differs between seasons in large Lake Taihu, China	2019	China	Temperate	Freshwater
215	Chen, NW; Mo, QL; Kuo, YM; Su, YP; Zhong, YP	Hydrochemical controls on reservoir nutrient and phytoplankton dynamics under storms	2018	China	Temperate	freshwater
216	Huang, CC; Shi, K; Yang, H; Li, YM; Zhu, AX; Sun, DY; Xu, LJ; Zou, J; Chen, X	Satellite observation of hourly dynamic characteristics of algae with Geostationary Ocean Color Imager (GOCI) data in Lake Taihu	2015	China	Temperate	Freshwater
217	Liu, H; Cao, Y; Li, W; Zhang, Z; Jeppesen, E; Wang, W	The effects of cadmium pulse dosing on physiological traits and growth of the submerged macrophyte Vallisneria spinulosa and phytoplankton biomass: a mesocosm study	2017	China	Temperate	Freshwater
218	Huang, QF; Li, N; Li, Y	Long-term trend of heat waves and potential effects on phytoplankton blooms in Lake Qiandaohu, a key drinking water reservoir	2021	China	Temperate	Freshwater
219	Huang, JC; Zhang, YJ; Arhonditsis, GB; Gao, JF; Chen, QW; Peng, J	The magnitude and drivers of harmful algal blooms in China's lakes and reservoirs: A national-scale characterization	2020	China	Temperate	Freshwater
220	Ochieng, B; Mbao, EO; Zhang, Z; Shi, LD; Liu, QG	Phytoplankton community structure of Tang-Pu Reservoir: status and ecological assessment in relation to physicochemical variability	2022	China	Temperate	Freshwater
221	Dong, J; Zhou, QC; Gao, YN; Gu, QH; Li, GB; Song, LR	Long-term effects of temperature and nutrient concentrations on the phytoplankton biomass in three lakes with differing trophic statuses on the Yungui Plateau, China	2018	China	Temperate	Freshwater
222	Xia, JJ; Zeng, J	Early warning of algal blooms based on the optimization support vector machine regression in a typical tributary bay of the Three Gorges Reservoir, China	2022	China	Temperate	Freshwater
223	He, H; Hu, E; Yu, JL; Luo, XG; Li, KY; Jeppesen, E; Liu, ZW	Does turbidity induced by Carassius carassius limit phytoplankton growth? A mesocosm study	2016	China	Temperate	Freshwater
224	Zou, W; Zhu, GW; Xu, H; Zhu, MY; Guo, CX; Qin, BQ; Zhang, YL	Atmospheric Stilling Promotes Summer Algal Growth in Eutrophic Shallow Lakes	2021	China	Temperate	Freshwater
225	Huang, JC; Gao, JF; Zhang, YJ	Combination of artificial neural network and clustering techniques for predicting phytoplankton biomass of Lake Poyang, China	2021	China	Temperate	Freshwater
226	Li, J; Yang, WJ; Li, WJ; Mu, L; Jin, ZW	Coupled hydrodynamic and water quality simulation of algal bloom in the Three Gorges Reservoir, China	2018	China	Temperate	Freshwater
227	Li, DL; Chang, FQ; Wen, XY; Duan, LZ; Zhang, HC	Seasonal Variations in Water Quality and Algal Blooming in Hypereutrophic Lake Qilu of Southwestern China	2022	China	Temperate	Freshwater
228	Li, Y; Xie, P; Zhao, DD; Zhu, TS; Guo, LG; Zhang, J	Eutrophication strengthens the response of zooplankton to temperature changes in a high-altitude lake	2016	China	Temperate	Freshwater
229	Li, J; Ma, RH; Xue, K; Loiselle, S	Drivers to spatial and temporal dynamics of column integrated phytoplankton biomass in the shallow lake of Chaohu, China	2019	China	Temperate	Freshwater
230	Mei, XY; Gao, SS; Liu, Y; Hu, J; Razlustkij, V; Rudstam, LG; Jeppesen, E; Liu, ZW; Zhang, XF	Effects of Elevated Temperature on Resources Competition of Nutrient and Light Between Benthic and Planktonic Algae	2022	China	Temperate	Freshwater
231	Xu, D; Chen, H	RANDOMLY DIRECTED AND LIGHT WINDS EXACERBATE THE EMERGENCE OF LARGE-SCALE CYANOBACTERIAL BLOOM AREAS IN LAKE TAIHU, CHINA	2020	China	Temperate	Freshwater
232	Zhou, BT; Shang, MS; Wang, GY; Feng, L; Shan, K; Liu, XN; Wu, L; Zhang, XR	Remote estimation of cyanobacterial blooms using the risky grade index (RGI) and coverage area index (CAI): a case study in the Three Gorges Reservoir, China	2017	China	Temperate	Freshwater
233	Hao, BB; Wu, HP; Jeppesen, E; Li, W	The response of phytoplankton communities to experimentally elevated temperatures in the presence and absence of Potamogeton crispus	2018	China	Temperate	Freshwater
234	Dong, J; Zhou, WC; Song, LR; Li, GB	Responses of phytoplankton functional groups to simulated winter warming	2015	China	Temperate	Freshwater
235	Nwankwegu, AS; Li, YP; Huang, YN; Wei, J; Norgbey, E; Lai, QY; Sarpong, L; Wang, K; Ji, DB; Yang, ZJ; Paerl, HW	Nutrient addition bioassay and phytoplankton community structure monitored during autumn in Xiangxi Bay of Three Gorges Reservoir, China	2020	China	Temperate	Freshwater
236	Cheng, K; Frenken, T; Brussaard, CPD; Van de Waal, DB	Cyanophage Propagation in the Freshwater Cyanobacterium Phormidium Is Constrained by Phosphorus Limitation and Enhanced by Elevated pCO(2)	2019	China	Temperate	Freshwater
237	Zhang, M; Qin, BL; Yu, Y; Yang, Z; Shi, XL; Kong, FX	Effects of temperature fluctuation on the development of cyanobacterial dominance in spring: implication of future climate change	2016	China	Temperate	Freshwater
238	Zhang, W; Jeppesen, E; Wang, MM; Xu, XY; Wang, LQ	Allelopathic effect boosts Chrysosporum ovalisporum dominance in summer at the expense of Microcystis panniformis in a shallow coastal water body	2017	China	Temperate	Freshwater
239	Wen, QZ; Xiao, P; Li, H; Li, WK; Yu, GL; Li, RH	Succession of Aphanizomenon flos-aquae and Microcystis aeruginosa in direct co-culture experiments at different temperatures and biomasses	2022	China	Temperate	Freshwater
240	Chen, JY; Pan, DL; Liu, ML; Mao, ZH; Zhu, QK; Chen, NH; Zhang, XY; Tao, BY	Relationships Between Long-Term Trend of Satellite-Derived Chlorophyll-a and Hypoxia Off the Changjiang Estuary	2017	China	Temperate	Brackish
241	Jiang, ZB; Liu, JJ; Chen, JF; Chen, QZ; Yan, XJ; Xuan, JL; Zeng, JN	Responses of summer phytoplankton community to drastic environmental changes in the Changjiang (Yangtze River) estuary during the past 50 years	2014	China	Temperate	Brackish
242	Xiong, YJ; Liu, JF	Can Saltwater Intrusion Affect a Phytoplankton Community and Its Net Primary Production? A Study Based on Satellite and Field Observations	2018	China	Temperate	Brackish
243	Li, JL; Sun, XX	Effects of different phosphorus concentrations and N/P ratios on the growth and photosynthetic characteristics of Skeletonema costatum and Prorocentrum donghaiense	2016	China	Temperate	Brackish
244	Li, JL; Sun, XX; Zheng, S	In situ study on photosynthetic characteristics of phytoplankton in the Yellow Sea and East China Sea in summer 2013	2016	China	Temperate	Marine
245	Song, L; Yang, GJ; Wang, NB; Lu, XQ	Relationship between environmental factors and plankton in the Bayuquan Port, Liaodong Bay, China: a five-year study	2015	China	Temperate	Marine
246	Shi, XL; Tang, LS; Li, SN; Xu, P; Kong, FX	The effects of CO2 on sestonic stoichiometry and community structure of crustacean zooplankton in a eutrophic lake: Increased competitive ability of Bosmina	2015	China	Temperate	Freshwater
247	Li, DW; Zhao, MX; Chen, MT	East Asian winter monsoon controlling phytoplankton productivity and community structure changes in the southeastern South China Sea over the last 185 kyr	2014	China	Tropical	Marine
248	Hou, LT; Wang, BS; Lai, CC; Chen, TY; Shih, YY; Shiah, FK; Ko, CY	Effects of Mixed Layer Depth on Phytoplankton Biomass in a Tropical Marginal Ocean: A Multiple Timescale Analysis	2022	China	Tropical	Marine
249	Yang, YY; Huang, BZ; Tang, YZ; Xu, N	Allelopathic effects of mixotrophic dinoflagellate Akashiwo sanguinea on co-occurring phytoplankton: the significance of nutritional ecology	2020	China	Temperate	Marine
250	Ramirez-Restrepo, JJ; Meneses, V; Vergara, A	Autecological study of Schroederia setigera in the tropical reservoir Riogrande II, Antioquia, Colombia	2015	Colombia	Tropical	freshwater
251	Rugema, E; Darchambeau, F; Sarmento, H; Stoyneva-Gartner, M; Leitao, M; Thiery, W; Latli, A; Descy, JP	Long-term change of phytoplankton in Lake Kivu: The rise of the greens	2019	Congo and Rwanda	Tropical	freshwater
252	Hillebrand, G; Hardenbicker, P; Fischer, H; Otto, W; Vollmer, S	Dynamics of total suspended matter and phytoplankton loads in the river Elbe	2018	Czech Republic	Temperate	Freshwater
253	Patynen, A; Elliott, JA; Kiuru, P; Sarvala, J; Ventela, AM; Jones, RI	Modelling the impact of higher temperature on the phytoplankton of a boreal lake	2022	Finland	Polar and Subpolar	Freshwater
254	Arvola, L; Salonen, K; Keskitalo, J; Tulonen, T; Jarvinen, M; Huotari, J	Plankton metabolism and sedimentation in a small boreal lake - a long-term perspective	2013	Finland	Polar and Subpolar	Freshwater
255	Lipsewers, T; Spilling, K	Microzooplankton, the missing link in Finnish plankton monitoring programs	2018	Finland	Polar and Subpolar	Marine
256	Almen, AK; Tamelander, T	Temperature-related timing of the spring bloom and match between phytoplankton and zooplankton	2020	finland	Temperate	Marine
257	Lisboa, F; Brotas, V; Santos, FD; Kuikka, S; Kaikkonen, L; Maeda, EE	Spatial Variability and Detection Levels for Chlorophyll-a Estimates in High Latitude Lakes Using Landsat Imagery	2020	Finland	Temperate	Freshwater
258	Maeda, EE; Lisboa, F; Kaikkonen, L; Kallio, K; Koponen, S; Brotas, V; Kuikka, S	Temporal patterns of phytoplankton phenology across high latitude lakes unveiled by long-term time series of satellite data	2019	Finland	Temperate	Freshwater
259	Jerney, J; Suikkanen, S; Lindehoff, E; Kremp, A	Future temperature and salinity do not exert selection pressure on cyst germination of a toxic phytoplankton species	2019	Finland	Temperate	Marine
260	Deng, JM; Qin, BQ; Sarvala, J; Salmaso, N; Zhu, GW; Ventela, AM; Zhang, YL; Gao, G; Nurminen, L; Kirkkala, T; Tarvainen, M; Vuorio, K	Phytoplankton assemblages respond differently to climate warming and eutrophication: A case study from Pyhajarvi and Taihu	2016	Finland and China	Temperate	Freshwater
261	Paczkowska, J; Rowe, O; Schluster, L; Legrand, C; Karlson, B; Andersson, A	Allochthonous matter: an important factor shaping the phytoplankton community in the Baltic Sea	2017	Finland and Sweden	Temperate	Marine
262	Jacquemin, C; Bertrand, C; Oursel, B; Thorel, M; Franquet, E; Cavalli, L	Growth rate of alpine phytoplankton assemblages from contrasting watersheds and N-deposition regimes exposed to nitrogen and phosphorus enrichments	2018	France	Temperate	Freshwater
263	Johnson, R; Langer, G; Rossi, S; Probert, I; Mammone, M; Ziveri, P	Nutritional response of a coccolithophore to changing pH and temperature	2022	France	Temperate	Marine
264	Maugendre, L; Gattuso, JP; Louis, J; de Kluijver, A; Marro, S; Soetaert, K; Gazeau, F	Effect of ocean warming and acidification on a plankton community in the NW Mediterranean Sea	2014	France	Temperate	Marine
265	Dessier, A; Bustamante, P; Chouvelon, T; Huret, M; Pagano, M; Marquis, E; Rousseaux, F; Pignon-Mussaud, C; Mornet, F; Breret, M; Dupuy, C	The spring mesozooplankton variability and its relationship with hydrobiological structure over year-to-year changes (2003-2013) in the southern Bay of Biscay (Northeast Atlantic)	2018	France	Temperate	Marine
266	Trombetta, T; Vidussi, F; Roques, C; Scotti, M; Mostajir, B	Marine Microbial Food Web Networks During Phytoplankton Bloom and Non-bloom Periods: Warming Favors Smaller Organism Interactions and Intensifies Trophic Cascade	2020	France	Temperate	Marine
267	Simon, M; Lopez-Garcia, P; Deschamps, P; Moreira, D; Restoux, G; Bertolino, P; Jardillier, L	Marked seasonality and high spatial variability of protist communities in shallow freshwater systems	2015	France	Temperate	Freshwater
268	Jacquet, S; Kerimoglu, O; Rimet, F; Paolini, G; Anneville, O	Cyanobacterial bloom termination: the disappearance of Planktothrix rubescens from Lake Bourget (France) after restoration	2014	France	Temperate	Freshwater
269	Soulie, T; Vidussi, F; Mas, S; Mostajir, B	Functional Stability of a Coastal Mediterranean Plankton Community During an Experimental Marine Heatwave	2022	France	Temperate	Brackish
270	Trombetta, T; Vidussi, F; Mas, S; Parin, D; Simier, M; Mostajir, B	Water temperature drives phytoplankton blooms in coastal waters	2019	France	Temperate	Brackish
271	Su, J; Tian, T; Krasemann, H; Schartau, M; Wirtz, K	Response patterns of phytoplankton growth to variations in resuspension in the German Bight revealed by daily MERIS data in 2003 and 2004	2015	Germany	Temperate	Marine
272	Paul, C; Matthiessen, B; Sommer, U	Warming, but not enhanced CO2 concentration, quantitatively and qualitatively affects phytoplankton biomass	2015	Germany	Temperate	Marine
273	Kunze, C; Gerhard, M; Jacob, M; Franke, NA; Schroeder, M; Striebel, M	Phytoplankton Community Performance Depends on the Frequency of Temperature Fluctuations	2022	Germany	Temperate	Marine
274	Werner, FJ; Matthiessen, B	Warming has stronger direct than indirect effects on benthic microalgae in a seaweed system in spring	2017	Germany	Temperate	Marine
275	Klamt, AM; Hilt, S; Moros, M; Arz, HW; Hupfer, M	The effect of a shift from macrophyte to phytoplankton dominance on phosphorus forms and burial in the sediments of a shallow hard-water lake	2019	Germany	Temperate	Freshwater
276	Dornhofer, K; Klinger, P; Heege, T; Oppelt, N	Multi-sensor satellite and in situ monitoring of phytoplankton development in a eutrophic-mesotrophic lake	2018	Germany	Temperate	Freshwater
277	Gerhard, M; Koussoroplis, AM; Hillebrand, H; Striebel, M	Phytoplankton community responses to temperature fluctuations under different nutrient concentrations and stoichiometry	2019	Germany	Temperate	Freshwater
278	Verbeek, L; Gall, A; Hillebrand, H; Striebel, M	Warming and oligotrophication cause shifts in freshwater phytoplankton communities	2018	Germany	Temperate	Freshwater
279	Wentzky, VC; Tittel, J; Jager, CG; Bruggeman, J; Rinke, K	Seasonal succession of functional traits in phytoplankton communities and their interaction with trophic state	2020	Germany	Temperate	Freshwater
280	Berger, SA; Diehl, S; Stibor, H; Sebastian, P; Scherz, A	Separating effects of climatic drivers and biotic feedbacks on seasonal plankton dynamics: no sign of trophic mismatch	2014	Germany	Temperate	Freshwater
281	Raitsos, DE; Korres, G; Triantafyllou, G; Petihakis, G; Pantazi, M; Tsiaras, K; Pollani, A	Assessing chlorophyll variability in relation to the environmental regime in Pagasitikos Gulf, Greece	2012	Greece	Temperate	Marine
282	Maliaka, V; Verstijnen, YJM; Faassen, EJ; Smolders, AJP; Lurling, M	Effects of guanotrophication and warming on the abundance of green algae, cyanobacteria and microcystins in Lake Lesser Prespa, Greece	2020	Greece	Temperate	Freshwater
283	Gkelis, S; Papadimitriou, T; Zaoutsos, N; Leonardos, I	Anthropogenic and climate-induced change favors toxic cyanobacteria blooms: Evidence from monitoring a highly eutrophic, urban Mediterranean lake	2014	Greece	Temperate	Freshwater
284	Sorensen, N; Daugbjerg, N; Richardson, K; Norregaard, RD; Espersen, L; Mohl, M; Nielsen, TG	Succession of picophytoplankton during the spring bloom 2012 in Disko Bay (West Greenland)-an unexpectedly low abundance of green algae	2017	Greenland	Polar and Subpolar	Marine
285	Qu, B; Gabric, AJ; Lu, ZF; Li, HH; Zhao, L	Unusual phytoplankton bloom phenology in the northern Greenland Sea during 2010	2016	Greenland	Polar and Subpolar	Marine
286	Hylander, S; Kiorboe, T; Snoeijs, P; Sommaruga, R; Nielsen, TG	Concentrations of sunscreens and antioxidant pigments in Arctic Calanus spp. in relation to ice cover, ultraviolet radiation, and the phytoplankton spring bloom	2015	Greenland	Polar and Subpolar	Marine
287	Thoisen, C; Riisgaard, K; Lundholm, N; Nielsen, TG; Hansen, PJ	Effect of acidification on an Arctic phytoplankton community from Disko Bay, West Greenland	2015	Greenland	Polar and Subpolar	Marine
288	Pancic, M; Hansen, PJ; Tammilehto, A; Lundholm, N	Resilience to temperature and pH changes in a future climate change scenario in six strains of the polar diatom Fragilariopsis cylindrus	2015	Greenland	Polar and Subpolar	Marine
289	Saros, JE; Strock, KE; Mccue, J; Hogan, E; Anderson, NJ	Response of Cyclotella species to nutrients and incubation depth in Arctic lakes	2014	Greenland	Polar and Subpolar	Freshwater
290	Finstad, AG; Nilsen, EB; Hendrichsen, DK; Schmidt, NM	Catchment vegetation and temperature mediating trophic interactions and production in plankton communities	2017	Greenland	Polar and Subpolar	Freshwater
291	Malik, HI; Northington, RM; Saros, JE	Nutrient limitation status of Arctic lakes affects the responses of Cyclotella sensu lato diatom species to light: implications for distribution patterns	2017	Greenland	Polar and Subpolar	Freshwater
292	Malik, HI; Saros, JE	Effects of temperature, light and nutrients on five Cyclotella sensu lato taxa assessed with in situ experiments in arctic lakes	2016	Greenland	Polar and Subpolar	Freshwater
293	Mayot, N; Matrai, P; Ellingsen, IH; Steele, M; Johnson, K; Riser, SC; Swift, D	Assessing Phytoplankton Activities in the Seasonal Ice Zone of the Greenland Sea Over an Annual Cycle	2018	Greenland and iceland	Polar and Subpolar	Marine
294	Fott, J; Nedbalova, L; Brabec, M; Kozakova, R; Rehakova, K; Hejzlar, J; Sorf, M; Vrba, J	Light as a controlling factor of winter phytoplankton in a monomictic reservoir	2022	The Czech Republic	Temperate	Freshwater
295	Palmer, SCJ; Odermatt, D; Hunter, PD; Brockmann, C; Presing, M; Balzter, H; Toth, VR	Satellite remote sensing of phytoplankton phenology in Lake Balaton using 10 years of MERIS observations	2015	Hungary	Temperate	Freshwater
296	Shetye, SS; Mohan, R; Patil, S; Jena, B; Chacko, R; George, JV; Noronha, S; Singh, N; Priya, L; Sudhakar, M	Oceanic pCO(2) in the Indian sector of the Southern Ocean during the austral summer-winter transition phase	2015	India	Polar and Subpolar	Marine
297	Poddar, S; Chacko, N; Swain, D	Estimation of Chlorophyll-a in Northern Coastal Bay of Bengal Using Landsat-8 OLI and Sentinel-2 MSI Sensors	2019	India	Tropical	Marine
298	Athira, TR; Nefla, A; Shifa, CT; Shamna, H; Aarif, KM; AlMaarofi, SS; Rashiba, AP; Reshi, OR; Jobiraj, T; Thejass, P; Bin Muzaffar, S	The impact of long-term environmental change on zooplankton along the southwestern coast of India	2022	India	Tropical	Marine
299	Umer, KS; Ebenezer, V; Subramoniam, T	A short-term study on the effect of environmental factor variation on a zooplankton community	2020	India	Tropical	Marine
300	Seelanki, V; Pant, V	An Evaluation of the Impact of Pandemic Driven Lockdown on the Phytoplankton Biomass Over the North Indian Ocean Using Observations and Model	2021	India	Tropical	Marine
301	Anandavelu, I; Robin, RS; Purvaja, R; Ganguly, D; Hariharan, G; Raghuraman, R; Prasad, MHK; Ramesh, R	Spatial heterogeneity of mesozooplankton along the tropical coastal waters	2020	India	Tropical	Marine
302	Jyothibabu, R; Vinayachandran, PN; Madhu, NV; Robin, RS; Karnan, C; Jagadeesan, L; Anjusha, A	Phytoplankton size structure in the southern Bay of Bengal modified by the Summer Monsoon Current and associated eddies: Implications on the vertical biogenic flux	2015	India	Tropical	Marine
303	Sathish, T; Nazrin, AK; Thomas, LC; Padmakumar, KB	Seasonal dynamics of dinoflagellates with special emphasis on potentially harmful species in a tropical estuarine system along the southwest coast of India	2014	India	Tropical	Marine
304	Vijith, V; Vinayachandran, PN; Thushara, V; Amol, P; Shankar, D; Anil, AC	Consequences of inhibition of mixed-layer deepening by the West India Coastal Current for winter phytoplankton bloom in the northeastern Arabian Sea	2016	India	Tropical	Marine
305	Das Sarkar, S; Sarkar, UK; Naskar, M; Roy, K; Bose, AK; Nag, SK; Karnatak, G; Das, BK	Effect of climato-environmental parameters on chlorophyll a concentration in the lower Ganga basin, India	2021	India	Tropical	Freshwater
306	Ahmed, A; Gauns, M; Shenoy, DM; Kurian, S; Naik, H; Naqvi, SWA	Phytoplankton dynamics in a seasonal stratified reservoir (Tillari), Western India	2021	India	Tropical	Freshwater
307	Karthik, R; Robin, RS; Anandavelu, I; Purvaja, R; Singh, G; Mugilarasan, M; Jayalakshmi, T; Samuel, VD; Ramesh, R	Diatom bloom in the Amba River, west coast of India: A nutrient-enriched tropical river-fed estuary	2020	India	Tropical	Freshwater
308	Setiawan, RY; Susanto, RD; Wirasatriya, A; Alifdini, I; Puryajati, AD; Maslukah, L; Nurdin, N	Impacts of Tropical Cyclone Seroja on the Phytoplankton Chlorophyll-a and Sea Surface Temperature in the Savu Sea, Indonesia	2021	Indonesia	Tropical	Marine
309	Nurdin, S; Mustapha, MA; Lihan, T; Tangang, F	Spatial and temporal variability of chlorophyll-a concentration in Makassar Strait using Empirical Orthogonal Function analysis of satellite images	2014	Indonesia	Tropical	Marine
310	Mohebbi, F; Riahi, H; Sheidaei, M; Shariatmadari, Z	Phytoplankton of Aras dam reservoir (Iran): an attempt to assess water quality	2016	Iran	Substropical	Freshwater
311	Spears, BM; Carvalho, L; Dudley, B; May, L	Variation in chlorophyll a to total phosphorus ratio across 94 UK and Irish lakes: Implications for lake management	2012	Ireland	Temperate	Freshwater
312	Carraro, E; Guyennon, N; Hamilton, D; Valsecchi, L; Manfredi, EC; Viviano, G; Salerno, F; Tartari, G; Copetti, D	Coupling high-resolution measurements to a three-dimensional lake model to assess the spatial and temporal dynamics of the cyanobacterium Planktothrix rubescens in a medium-sized lake	2012	Italy	Temperate	Freshwater
313	Free, G; Bresciani, M; Pinardi, M; Peters, S; Laanen, M; Padula, R; Cingolani, A; Charavgis, F; Giardino, C	Shorter blooms expected with longer warm periods under climate change: an example from a shallow meso-eutrophic Mediterranean lake	2022	Italy	Temperate	Freshwater
314	Pinardi, M; Bresciani, M; Villa, P; Cazzaniga, I; Laini, A; Toth, V; Fadel, A; Austoni, M; Lami, A; Giardino, C	Spatial and temporal dynamics of primary producers in shallow lakes as seen from space: Intra-annual observations from Sentinel-2A	2018	Italy	Temperate	Freshwater
315	Pinardi, M; Fenocchi, A; Giardino, C; Sibilla, S; Bartoli, M; Bresciani, M	Assessing Potential Algal Blooms in a Shallow Fluvial Lake by Combining Hydrodynamic Modelling and Remote-Sensed Images	2015	Italy	Temperate	Freshwater
316	Pulina, S; Padedda, BM; Satta, CT; Sechi, N; Luglie, A	Long-term phytoplankton dynamics in a Mediterranean eutrophic lagoon (Cabras Lagoon, Italy)	2012	Italy	Temperate	Brackish
317	Li, W; Xu, XG; Yao, JM; Tanaka, N; Nishimura, O; Ma, H	Combined effects of elevated carbon dioxide and temperature on phytoplankton-zooplankton link: A multi-influence of climate change on freshwater planktonic communities	2019	Japan	Substropical	Freshwater
318	Chiba, S; Batten, S; Sasaoka, K; Sasai, Y; Sugisaki, H	Influence of the Pacific Decadal Oscillation on phytoplankton phenology and community structure in the western North Pacific	2012	Japan	Temperate	Marine
319	Maure, ER; Ishizaka, J; Sukigara, C; Mino, Y; Aiki, H; Matsuno, T; Tomita, H; Goes, JI; Gomes, HR	Mesoscale Eddies Control the Timing of Spring Phytoplankton Blooms: A Case Study in the Japan Sea	2017	Japan	Temperate	Marine
320	Tsuchiya, K; Kuwahara, VS; Yoshiki, T; Nakajima, R; Miyaguchi, H; Kumekawa, N; Kikuchi, T; Toda, T	Phytoplankton community response and succession in relation to typhoon passages in the coastal waters of Japan	2014	Japan	Temperate	Marine
321	Feng, C; Ishizaka, J; Saitoh, K; Mine, T; Yamashita, H	A Novel Method Based on Backscattering for Discriminating Summer Blooms of the Raphidophyte (Chattonella spp.) and the Diatom (Skeletonema spp.) Using MODIS Images in Ariake Sea, Japan	2020	Japan	Temperate	Marine
322	Kodama, T; Wagawa, T; Iguchi, N; Takada, Y; Takahashi, T; Fukudome, KI; Morimoto, H; Goto, T	Spatial variations in zooplankton community structure along the Japanese coastline in the Japan Sea: influence of the coastal current	2021	Japan	Temperate	Marine
323	Vidyarathna, NK; Graneli, E	Influence of temperature on growth, toxicity and carbohydrate production of a Japanese Ostreopsis ovata strain, a toxic-bloom-forming dinoflagellate	2012	Japan	Temperate	Marine
324	Rosas-Navarro, A; Langer, G; Ziveri, P	Temperature effects on sinking velocity of different Emiliania huxleyi strains	2018	Japan	Temperate	Marine
325	Salem, SI; Strand, MH; Higa, H; Kim, H; Kazuhiro, K; Oki, K; Oki, T	Evaluation of MERIS Chlorophyll-a Retrieval Processors in a Complex Turbid Lake Kasumigaura over a 10-Year Mission	2017	Japan	Temperate	Freshwater
326	Yajima, H; Choi, JK	Changes in phytoplankton biomass due to diversion of an inflow into the Urayama Reservoir	2013	Japan	Temperate	Freshwater
327	Li, W; Xu, XG; Fujibayashi, M; Niu, QG; Tanaka, N; Nishimura, O	Response of microalgae to elevated CO2 and temperature: impact of climate change on freshwater ecosystems	2016	Japan	Temperate	Freshwater
328	Kuroda, H; Toya, Y; Watanabe, T; Nishioka, J; Hasegawa, D; Taniuchi, Y; Kuwata, A	Influence of Coastal Oyashio water on massive spring diatom blooms in the Oyashio area of the North Pacific Ocean	2019	Japan	Temperate	Marine
329	Roegner, A; Sitoki, L; Weirich, C; Corman, J; Owage, D; Umami, M; Odada, E; Miruka, J; Ogari, Z; Smith, W; Rejmankova, E; Miller, TR	Harmful Algal Blooms Threaten the Health of Peri-Urban Fisher Communities: A Case Study in Kisumu Bay, Lake Victoria, Kenya	2020	Kenya	Tropical	Freshwater
330	Kang, JJ; Jang, HK; Lim, JH; Lee, D; Lee, JH; Bae, H; Lee, CH; Kang, CK; Lee, SH	Characteristics of Different Size Phytoplankton for Primary Production and Biochemical Compositions in the Western East/Japan Sea	2020	Korea, Japan, Russia and China	Substropical	Marine
331	Devlin, MJ; Breckels, M; Graves, CA; Barry, J; Capuzzo, E; Huerta, FP; Al Ajmi, F; Al-Hussain, MM; LeQuesne, WJF; Lyons, BP	Seasonal and Temporal Drivers Influencing Phytoplankton Community in Kuwait Marine Waters: Documenting a Changing Landscape in the Gulf	2019	Kuwait	Tropical	Marine
332	Free, G; Bresciani, M; Pinardi, M; Giardino, C; Alikas, K; Kangro, K; Room, EI; Vaiciute, D; Bucas, M; Tiskus, E; Hommersom, A; Laanen, M; Peters, S	Detecting Climate Driven Changes in Chlorophyll-a Using High Frequency Monitoring: The Impact of the 2019 European Heatwave in Three Contrasting Aquatic Systems	2021	Luthania, Estonia and Italy	Temperate	Freshwater and Brackish
333	Lim, JH; Lee, CW; Kudo, I	Temporal variation of phytoplankton growth and grazing loss in the west coast of Peninsular Malaysia	2015	Malasyia	Tropical	Marine
334	Diaz-Torres, O; de Anda, J; Lugo-Melchor, OY; Pacheco, A; Orozco-Nunnelly, DA; Shear, H; Senes-Guerrero, C; Gradilla-Hernandez, MS	Rapid Changes in the Phytoplankton Community of a Subtropical, Shallow, Hypereutrophic Lake During the Rainy Season	2021	Mexico	Substropical	Freshwater
335	Robles-Tamayo, CM; Garcia-Morales, R; Romo-Leon, JR; Figueroa-Preciado, G; Penalba-Garmendia, MC; Enriquez-Ocana, LF	Variability of Chl a Concentration of Priority Marine Regions of the Northwest of Mexico	2022	Mexico	Tropical	Marine
336	Villafane, VE; Guendulain-Garcia, SD; Valadez, F; Rosiles-Gonzalez, G; Helbling, EW; Banaszak, AT	Antagonistic and synergistic responses to solar ultraviolet radiation and increased temperature of phytoplankton from cenotes (sink holes) of the Yucatan Peninsula, Mexico	2022	Mexico	Tropical	Freshwater
337	Rowland, FE; North, RL; McEachern, P; Obrecht, DV; Gurung, TB; Jones, SB; Jones, JR	Phytoplankton nutrient deficiencies vary with season in sub-tropical lakes of Nepal	2019	Nepal	Substropical	Freshwater
338	Prins, TC; Desmit, X; Baretta-Bekker, JG	Phytoplankton composition in Dutch coastal waters responds to changes in riverine nutrient loads	2012	Netherlands	Temperate	Marine
339	Frenken, T; Brussaard, CPD; Velthuis, M; Aben, R; Kazanjian, G; Hilt, S; Kosten, S; Peeters, ETHM; Domis, LND; Stephan, S; van Donk, E; Van de Waal, DB	Warming advances virus population dynamics in a temperate freshwater plankton community	2020	Netherlands	Temperate	Freshwater
340	Lurling, M; Mello, MME; van Oosterhout, F; Domis, LD; Marinho, MM	Response of Natural Cyanobacteria and Algae Assemblages to a Nutrient Pulse and Elevated Temperature	2018	Netherlands	Temperate	Freshwater
341	Stelzer, JAA; Mesman, JP; Gsell, AS; Domis, LNS; Visser, PM; Adrian, R; Ibelings, BW	Phytoplankton responses to repeated pulse perturbations imposed on a trend of increasing eutrophication	2022	Netherlands	Temperate	Freshwater
342	Frenken, T; Velthuis, M; Domis, LND; Stephan, S; Aben, R; Kosten, S; van Donk, E; Van de Waal, DB	Warming accelerates termination of a phytoplankton spring bloom by fungal parasites	2015	Netherlands	Temperate	Freshwater
343	Domis, LND; Van de Waal, DB; Helmsing, NR; Van Donk, E; Mooij, WM	Community stoichiometry in a changing world: combined effects of warming and eutrophication on phytoplankton dynamics	2014	Netherlands	Temperate	Freshwater
344	Velthuis, M; Domis, LND; Frenken, T; Stephan, S; Kazanjian, G; Aben, R; Hilt, S; Kosten, S; van Donk, E; Van de Waal, DB	Warming advances top-down control and reduces producer biomass in a freshwater plankton community	2017	Netherlands	Temperate	Freshwater
345	Jacobs, P; Pitarch, J; Kromkamp, JC; Philippart, CJM	Assessing biomass and primary production of microphytobenthos in depositional coastal systems using spectral information	2021	Netherlands	Temperate	Brackish
346	Bermudez, R; Feng, YY; Roleda, MY; Tatters, AO; Hutchins, DA; Larsen, T; Boyd, PW; Hurd, CL; Riebesell, U; Winder, M	Long-Term Conditioning to Elevated pCO(2) and Warming Influences the Fatty and Amino Acid Composition of the Diatom Cylindrotheca fusiformis	2015	New zealand	Temperate	Marine
347	Prebble, JG; Crouch, EM; Carter, L; Cortese, G; Nodder, SD	Dinoflagellate cysts from two sediment traps east of New Zealand	2013	New zealand	Temperate	Marine
348	Feng, YY; Roleda, MY; Armstrong, E; Summerfield, TC; Law, CS; Hurd, CL; Boyd, PW	Effects of multiple drivers of ocean global change on the physiology and functional gene expression of the coccolithophoreEmiliania huxleyi	2020	New zealand	Temperate	Marine
349	Krajewska, M; Szymczak-Zyla, M; Tylmann, W; Kowalewska, G	Climate change impact on primary production and phytoplankton taxonomy in Western Spitsbergen fjords based on pigments in sediments	2020	Norway	Polar and Subpolar	Marine
350	Lorenzo, MR; Iniguez, C; Egge, JK; Larsen, A; Berger, SA; Garcia-Gomez, C; Segovia, M	Increased CO2 and iron availability effects on carbon assimilation and calcification on the formation of Emiliania huxleyi blooms in a coastal phytoplankton community	2017	Norway	Polar and Subpolar	Marine
351	Giraudeau, J; Hulot, V; Hanquiez, V; Devaux, L; Howa, H; Garlan, T	A survey of the summer coccolithophore community in the western Barents Sea	2016	Norway	Polar and Subpolar	Marine
352	Singh, A; David, TD; Tripathy, SC; Naik, RK	Interplay of regional oceanography and biogeochemistry on phytoplankton bloom development in an Arctic fjord	2020	Norway	Polar and Subpolar	Marine
353	Bhaskar, JT; Tripathy, SC; Sabu, P; Laluraj, CM; Rajan, S	Variation of phytoplankton assemblages of Kongsfjorden in early autumn 2012: a microscopic and pigment ratio-based assessment	2012	Norway	Polar and Subpolar	Marine
354	Dong, KX; Kvile, KO; Stenseth, NC; Stige, LC	Associations among temperature, sea ice and phytoplankton bloom dynamics in the Barents Sea	2016	Norway	Polar and Subpolar	Marine
355	van de Poll, WH; Kulk, G; Rozema, PD; Brussaard, CPD; Visser, RJW; Buma, AGJ	Contrasting glacial meltwater effects on post-bloom phytoplankton on temporal and spatial scales in Kongsfjorden, Spitsbergen	2018	Norway	Polar and Subpolar	Marine
356	van de Poll, WH; Maat, DS; Fischer, P; Visser, RJW; Brussaard, CPD; Buma, AGJ	Solar radiation and solar radiation driven cycles in warming and freshwater discharge control seasonal and inter-annual phytoplankton chlorophyll a and taxonomic composition in a high Arctic fjord (Kongsfjorden, Spitsbergen)	2020	Norway	Polar and Subpolar	Marine
357	Ha, SY; Kim, YN; Park, MO; Kang, SH; Kim, HC; Shin, KH	Production of mycosporine-like amino acids of in situ phytoplankton community in Kongsfjorden, Svalbard, Arctic	2012	Norway	Polar and Subpolar	Marine
358	Schulz, KG; Bellerby, RGJ; Brussaard, CPD; Budenbender, J; Czerny, J; Engel, A; Fischer, M; Koch-Klavsen, S; Krug, SA; Lischka, S; Ludwig, A; Meyerhofer, M; Nondal, G; Silyakova, A; Stuhr, A; Riebesell, U	Temporal biomass dynamics of an Arctic plankton bloom in response to increasing levels of atmospheric carbon dioxide	2013	Norway	Polar and Subpolar	Marine
359	Kauko, HM; Taskjelle, T; Assmy, P; Pavlov, AK; Mundy, CJ; Duarte, P; Fernandez-Mendez, M; Olsen, LM; Hudson, SR; Johnsen, G; Elliott, A; Wang, FY; Granskog, MA	Windows in Arctic sea ice: Light transmission and ice algae in a refrozen lead	2017	Norway	Polar and Subpolar	Marine
360	Freesel, D; Soreide, JE; Niehoff, B	A year-round study on digestive enzymes in the Arctic copepod Calanus glacialis: implications for its capability to adjust to changing environmental conditions	2016	Norway	Polar and Subpolar	Marine
361	Krause, JW; Duarte, CM; Marquez, IA; Assmy, P; Fernandez-Mendez, M; Wiedmann, I; Wassmann, P; Kristiansen, S; Agusti, S	Biogenic silica production and diatom dynamics in the Svalbard region during spring	2018	Norway	Polar and Subpolar	Marine
362	Olsen, LM; Laney, SR; Duarte, P; Kauko, HM; Fernandez-Mendez, M; Mundy, CJ; Rosel, A; Meyer, A; Itkin, P; Cohen, L; Peeken, I; Tatarek, A; Rozanska-Pluta, M; Wiktor, J; Taskjelle, T; Pavlov, AK; Hudson, SR; Granskog, MA; Hop, H; Assmy, P	The seeding of ice algal blooms in Arctic pack ice: The multiyear ice seed repository hypothesis	2017	Norway	Polar and Subpolar	Marine
363	Wolf, KKE; Hoppe, CJM; Rost, B	Resilience by diversity: Large intraspecific differences in climate change responses of an Arctic diatom	2017	Norway	Polar and Subpolar	Marine
364	Wolf, KKE; Romanelli, E; Rost, B; John, U; Collins, S; Weigand, H; Hoppe, CJM	Company matters: The presence of other genotypes alters traits and intraspecific selection in an Arctic diatom under climate change	2019	Norway	Polar and Subpolar	Marine
365	Zhang, Y; Klapper, R; Lohbeck, KT; Bach, LT; Schulz, KG; Reusch, TBH; Riebesell, U	Between- and within-population variations in thermal reaction norms of the coccolithophore Emiliania huxleyi	2014	Norway	Temperate	Marine
366	Segovia, M; Lorenzo, MR; Maldonado, MT; Larsen, A; Berger, SA; Tsagaraki, TM; Lazaro, FJ; Iniguez, C; Garcia-Gomez, C; Palma, A; Mausz, MA; Gordillo, FJL; Fernandez, JA; Ray, JL; Egge, JK	Iron availability modulates the effects of future CO2 levels within the marine planktonic food web	2017	Norway	Temperate	Marine
367	Couture, RM; Moe, SJ; Lin, Y; Kaste, O; Haande, S; Solheim, AL	Simulating water quality and ecological status of Lake Vansjo, Norway, under land-use and climate change by linking process-oriented models with a Bayesian network	2018	Norway	Temperate	Freshwater
368	Schwarzenberger, A; Martin-Creuzburg, D	Daphnia's Adaptive Molecular Responses to the Cyanobacterial Neurotoxin Anatoxin-alpha Are Maternally Transferred	2021	Norway	Temperate	Freshwater
369	Tenorio, C; Alvarez, G; Perez-Alania, M; Blanco, JL; Paulino, C; Blanco, J; Uribe, E	Bloom of Prorocentrum cordatum in Paracas Bay, Peru	2022	Peru	Tropical	Marine
370	Marki, A; Pahlow, M	Microzooplankton Stoichiometric Plasticity Inferred from Modeling Mesocosm Experiments in the Peruvian Upwelling Region	2016	Peru	Tropical	Marine
371	Lenard, T; Wojciechowska, W	PHYTOPLANKTON DIVERSITY AND BIOMASS DURING WINTER WITH AND WITHOUT ICE COVER IN THE CONTEXT OF CLIMATE CHANGE	2013	Poland	Temperate	Freshwater
372	Lenard, T; Ejankowski, W; Poniewozik, M	Responses of Phytoplankton Communities in Selected Eutrophic Lakes to Variable Weather Conditions	2019	Poland	Temperate	Freshwater
373	Lenard, T; Ejankowski, W; Poniewozik, M	Different responses of primary producers to mild winter in macrophyte- and phytoplankton-dominated lakes	2019	Poland	Temperate	Freshwater
374	Napiorkowska-Krzebietke, A; Kalinowska, K; Bogacka-Kapusta, E; Stawecki, K; Traczuk, P	Cyanobacterial Blooms and Zooplankton Structure in Lake Ecosystem under Limited Human Impact	2020	Poland	Temperate	Freshwater
375	Kruk, M; Gozdziejewska, AM; Artiemjew, P	Predicting the effects of winter water warming in artificial lakes on zooplankton and its environment using combined machine learning models	2020	Poland	Temperate	Freshwater
376	Goela, PC; Icely, J; Cristina, S; Danchenko, S; DelValls, TA; Newton, A	Using bio-optical parameters as a tool for detecting changes in the phytoplankton community (SW Portugal)	2015	Portugal	Temperate	Marine
377	Danchenko, S; Dodge, JD; Icely, JD; Newton, A	Dinoflagellate Assemblages in the West Iberian Upwelling Region (Sagres, Portugal) During 1994-2001	2022	Portugal	Temperate	Marine
378	Gallo, F; Schulz, KG; Azevedo, EB; Madruga, J; e Ramos, JB	Responses of the diatom Asterionellopsis glacialis to increasing sea water CO2 concentrations and turbulence	2016	Portugal	Temperate	Marine
379	Rodrigues, M; Cravo, A; Freire, P; Rosa, A; Santos, D	Temporal assessment of the water quality along an urban estuary (Tagus estuary, Portugal)	2020	Portugal	Temperate	Brackish
380	Cereja, R; Chainho, P; Brotas, V; Cruz, JPC; Sent, G; Rodrigues, M; Carvalho, F; Cabral, S; Brito, AC	Spatial Variability of Physicochemical Parameters and Phytoplankton at the Tagus Estuary (Portugal)	2021	Portugal	Temperate	Brackish
381	Cereja, R; Brotas, V; Cruz, JPC; Rodrigues, M; Brito, AC	Tidal and Physicochemical Effects on Phytoplankton Community Variability at Tagus Estuary (Portugal)	2021	Portugal	Temperate	Brackish
382	Vidal, T; Calado, AJ; Moita, MT; Cunha, MR	Phytoplankton dynamics in relation to seasonal variability and upwelling and relaxation patterns at the mouth of Ria de Aveiro (West Iberian Margin) over a four-year period	2017	Portugal	Temperate	Brackish
383	Shimaraeva, SV; Pislegina, EV; Krashchuk, LS; Shchapov, KS; Silow, EA	Dynamics of Chlorophyll a Concentration in the South Baikal Pelagic during the Direct Temperature Stratification Period	2017	Russia	Polar and Subpolar	Freshwater
384	Gbagir, AMG; Colpaert, A	Assessing the Trend of the Trophic State of Lake Ladoga Based on Multi-Year (1997-2019) CMEMS GlobColour-Merged CHL-OC5 Satellite Observations	2020	Russia	Polar and Subpolar	Freshwater
385	Jewson, DH; Granin, NG; Gnatovsky, RY; Lowry, SF; Teubner, K	Coexistence of two Cyclotella diatom species in the plankton of Lake Baikal	2015	Russia	Polar and Subpolar	Freshwater
386	Golubkov, M; Nikulina, V; Golubkov, S	Effects of environmental variables on midsummer dinoflagellate community in the Neva Estuary (Baltic Sea)	2019	Russia	Polar and Subpolar	Brackish
387	Golubkov, M; Nikulina, V; Golubkov, S	Species-level associations of phytoplankton with environmental variability in the Neva Estuary (Baltic Sea)	2021	Russia	Polar and Subpolar	Brackish
388	Golubkov, M; Golubkov, S	Relationships Between Northern Hemisphere Teleconnection Patterns and Phytoplankton Productivity in the Neva Estuary (Northeastern Baltic Sea)	2021	Russia	Temperate	Brackish
389	Brewin, RJW; Moran, XAG; Raitsos, DE; Gittings, JA; Calleja, MLI; Viegas, M; Ansari, MI; Al-Otaibi, N; Huete-Stauffer, TM; Hoteit, I	Factors Regulating the Relationship Between Total and Size-Fractionated Chlorophyll-a in Coastal Waters of the Red Sea	2019	Saudi Arabia	Tropical	Marine
390	Papagiannopoulos, N; Raitsos, DE; Krokos, G; Gittings, JA; Brewin, RJW; Papadopoulos, VP; Pavlidou, A; Selmes, N; Groom, S; Hoteit, I	Phytoplankton Biomass and the Hydrodynamic Regime in NEOM, Red Sea	2021	Saudi Arabia	Tropical	Marine
391	Jin, P; Agusti, S	Fast adaptation of tropical diatoms to increased warming with trade-offs	2018	Saudi Arabia	Tropical	Marine
392	Kottuparambil, S; Jin, P; Agusti, S	Adaptation of Red Sea Phytoplankton to Experimental Warming Increases Their Tolerance to Toxic Metal Exposure	2019	Saudi Arabia	Tropical	Marine
393	Al-Hasawi, ZM; Hariri, MS; Touliabah, HE	PHYSICO-CHEMICAL FACTORS AND BIODIVERSITY OF MICROALGAL FLORA IN RABIGH LAGOON UNDER GLOBAL CLIMATE CHANGE	2017	Saudi Arabia	Tropical	Brackish
394	Shafeeque, M; Sathyendranath, S; George, G; Balchand, AN; Platt, T	Comparison of Seasonal Cycles of Phytoplankton Chlorophyll, Aerosols, Winds and Sea-Surface Temperature off Somalia	2017	Somalia	Tropical	Marine
395	Tirok, K; Scharler, UM	Dynamics of pelagic and benthic microalgae during drought conditions in a shallow estuarine lake (Lake St. Lucia)	2013	South Africa	Substropical	Brackish
396	Lamont, T; Barlow, RG; Brewin, RJW	Long-Term Trends in Phytoplankton Chlorophyll a and Size Structure in the Benguela Upwelling System	2019	South Africa	Temperate	Marine
397	Malahlela, OE; Oliphant, T; Tsoeleng, LT; Mhangara, P	Mapping chlorophyll-a concentrations in a cyanobacteria- and algae-impacted Vaal Dam using Landsat 8 OLI data	2018	South Africa	Temperate	Freshwater
398	Matthews, MW	Eutrophication and cyanobacterial blooms in South African inland waters: 10 years of MERIS observations	2014	South Africa	Temperate	Freshwater
399	Ali, K; Abiye, T; Adam, E	Integrating In Situ and Current Generation Satellite Data for Temporal and Spatial Analysis of Harmful Algal Blooms in the Hartbeespoort Dam, Crocodile River Basin, South Africa	2022	South Africa	Temperate	Freshwater
400	Barnard, S; Morgenthal, TL; Stolz, M; Venter, A	Impact of land-use and flow conditions on the phytoplankton of the Sabie River, South Africa	2021	South Africa	Temperate	Freshwater
401	Lee, D; Jeong, JY; Jang, HK; Min, JO; Kim, MJ; Youn, SH; Lee, T; Lee, SH	Comparison of Particulate Organic Carbon to Chlorophyll-a Ratio Based on the Ocean Color Satellite Data at the Ieodo and Socheongcho Ocean Research Stations	2019	South Korea	Temperate	Marine
402	Lee, KH; Jeong, HJ; Lee, K; Franks, PJS; Seong, KA; Lee, SY; Lee, MJ; Jang, SH; Potvin, E; Lim, AS; Yoon, EY; Du Yoo, Y; Kang, NS; Kim, KY	Effects of warming and eutrophication on coastal phytoplankton production	2019	South Korea	Temperate	Marine
403	Kim, JH; Kim, KY; Kang, EJ; Lee, K; Kim, JM; Park, KT; Shin, K; Hyun, B; Jeong, HJ	Enhancement of photosynthetic carbon assimilation efficiency by phytoplankton in the future coastal ocean	2013	South Korea	Temperate	Marine
404	Lim, MH; Lee, CH; Min, J; Lee, HG; Kim, KY	Effect of elevated pCO(2) on thermal performance of Chattonella marina and Chattonella ovata (Raphidophyceae)	2020	South Korea	Temperate	marine
405	Lim, YK; Baek, SH; Lee, M; Kim, YO; Choi, KH; Kim, JH	Phytoplankton composition associated with physical and chemical variables during summer in the southern sea of Korea: Implication of the succession of the two toxic dinoflagellates Cochlodinium (a.k.a. Margalefidinium) polykrikoides and Alexandrium affine	2019	South Korea	Temperate	Marine
406	Lee, DH; Fabian, PS; Kim, JH; Kang, JH	HSPF-Based Assessment of Inland Nutrient Source Control Strategies to Reduce Algal Blooms in Streams in Response to Future Climate Changes	2021	South Korea	Temperate	Freshwater
407	Jung, S; Shin, M; Kim, J; Eum, J; Lee, Y; Lee, J; Choi, Y; You, K; Owen, J; Kim, B	The effects of Asian summer monsoons on algal blooms in reservoirs	2016	South Korea	Temperate	Freshwater
408	Kim, J; Lee, T; Seo, D	Algal bloom prediction of the lower Han River, Korea using the EFDC hydrodynamic and water quality model	2017	South Korea	Temperate	freshwater
409	Park, S; Sin, Y	Artificial Neural Network (ANN) Modeling Analysis of Algal Blooms in an Estuary with Episodic and Anthropogenic Freshwater Inputs	2021	South Korea	Temperate	Brackish
410	Bach, LT; Hernandez-Hernandez, N; Taucher, J; Spisla, C; Sforna, C; Riebesell, U; Aristegui, J	Effects of Elevated CO2 on a Natural Diatom Community in the Subtropical NE Atlantic	2019	Spain	Substropical	Marine
411	Stengel, DB; Conde-Alvarez, R; Connan, S; Nitschke, U; Arenas, F; Abreu, H; Barufi, JB; Chow, F; Robledo, D; Malta, EJ; Mata, M; Konotchick, T; Nassar, C; Perez-Ruzafa, A; Lopez, D; Marquardt, R; Vaz-Pinto, F; Celis-Pla, PSM; Hermoso, M; Ruiz, E; Ordonez, G; Flores, P; Zanolla, M; Banares-Espana, E; Altamirano, M; Korbee, N; Bischof, K; Figueroa, FL	Short-term effects of CO2, nutrients and temperature on three marine macroalgae under solar radiation	2014	Spain	Temperate	Marine
412	Baldassini, N; Foresi, LM; Lirer, F; Sprovieri, M; Turco, E; Pelosi, N; Di Stefano, A	Middle Miocene stepwise climate evolution in the Mediterranean region through high-resolution stable isotopes and calcareous plankton records	2021	Spain	Temperate	Marine
413	Alvarez, I; Lorenzo, MN; deCastro, M	Analysis of chlorophyll a concentration along the Galician coast: seasonal variability and trends	2012	Spain	Temperate	Marine
414	Jimenez-Quiroz, MD; Cervantes-Duarte, R; Funes-Rodriguez, R; Baron-Campis, SA; Garcia-Romero, FD; Hernandez-Trujillo, S; Hernandez-Becerril, DU; Gonzalez-Armas, R; Martell-Dubois, R; Cerdeira-Estrada, S; Fernandez-Mendez, JI; Gonzalez-Ania, LV; Vasquez-Ortiz, M; Barron-Barraza, FJ	Impact of The Blob and El Nino in the SW Baja California Peninsula: Plankton and Environmental Variability of Bahia Magdalena	2019	Spain	Temperate	Marine
415	Paches, M; Aguado, D; Martinez-Guijarro, R; Romero, I	Long-term study of seasonal changes in phytoplankton community structure in the western Mediterranean (Valencian Community)	2019	Spain	Temperate	Marine
416	Listmann, L; Hattich, GSI; Matthiessen, B; Reusch, TBH	Eco-Evolutionary Interaction in Competing Phytoplankton: Nutrient Driven Genotype Sorting Likely Explains Dominance Shift and Species Responses to CO2	2020	Spain	Temperate	Marine
417	Diaz, PA; Ruiz-Villarreal, M; Mourino-Carballido, B; Fernandez-Pena, C; Riobo, P; Reguera, B	Fine scale physical-biological interactions during a shift from relaxation to upwelling with a focus on Dinophysis acuminata and its potential ciliate prey	2019	Spain	Temperate	Marine
418	Carrillo, P; Medina-Sanchez, JM; Duran, C; Herrera, G; Villafane, VE; Helbling, EW	Synergistic effects of UVR and simulated stratification on commensalistic phytoplankton-bacteria relationship in two optically contrasting oligotrophic Mediterranean lakes	2015	Spain	Temperate	Freshwater
419	Fernandez-Rodriguez, M; Hidalgo-Lara, C; Jimenez-Rodriguez, A; Serrano, L	Bloom-Forming Microalgae in High-Species Phytoplankton Assemblages Under Light-Fluctuating and Low Phosphate Conditions	2015	Spain	Temperate	Brackish
420	Intxausti, L; Villate, F; Uriarte, I; Iriarte, A; Ameztoy, I	Size-related response of zooplankton to hydroclimatic variability and water-quality in an organically polluted estuary of the Basque coast (Bay of Biscay)	2012	Spain	Temperate	Brackish
421	Figueroa, FL; Barufi, JB; Malta, EJ; Conde-Alvarez, R; Nitschke, U; Arenas, F; Mata, M; Connan, S; Abreu, MH; Marquardt, R; Vaz-Pinto, F; Konotchick, T; Celis-Pla, PSM; Hermoso, M; Ordonez, G; Ruiz, E; Flores, P; de los Rios, J; Kirke, D; Chow, F; Nassar, CAG; Robledo, D; Perez-Ruzafa, A; Banares-Espana, E; Altamirano, M; Jimenez, C; Korbee, N; Bischof, K; Stengel, DB	Short-term effects of increasing CO2, nitrate and temperature on three Mediterranean macroalgae: biochemical composition	2014	Spain	Temperate	Marine
422	Bergstrom, AK; Faithfull, C; Karlsson, D; Karlsson, J	Nitrogen deposition and warming - effects on phytoplankton nutrient limitation in subarctic lakes	2013	Sweden	Polar and Subpolar	Freshwater
423	Bergstrom, AK; Deininger, A; Jonsson, A; Karlsson, J; Vrede, T	Effects of nitrogen enrichment on zooplankton biomass and N:P recycling ratios across a DOC gradient in northern-latitude lakes	2021	Sweden	Polar and Subpolar	Freshwater
424	Paczkowska, J; Brugel, S; Rowe, O; Lefebure, R; Brutemark, A; Andersson, A	Response of Coastal Phytoplankton to High Inflows of Terrestrial Matter	2020	Sweden	Temperate	Marine
425	Wohlrab, S; John, U; Klemm, K; Eberlein, T; Grivogiannis, AMF; Krock, B; Frickenhaus, S; Bach, LT; Rost, B; Riebesell, U; Van de Waal, DB	Ocean acidification increases domoic acid contents during a spring to summer succession of coastal phytoplankton	2020	Sweden	Temperate	marine
426	Ribeiro, S; Berge, T; Lundholm, N; Ellegaard, M	Hundred Years of Environmental Change and Phytoplankton Ecophysiological Variability Archived in Coastal Sediments	2013	Sweden	Temperate	Marine
427	Bergstrom, AK; Jonsson, A; Isles, PDF; Creed, IF; Lau, DCP	Changes in nutritional quality and nutrient limitation regimes of phytoplankton in response to declining N deposition in mountain lakes	2020	Sweden	Temperate	Freshwater
428	Arfe, A; Quatto, P; Zambon, A; MacIsaac, HJ; Manca, M	Long-Term Changes in the Zooplankton Community of Lake Maggiore in Response to Multiple Stressors: A Functional Principal Components Analysis	2019	Switzerland	Temperate	Freshwater
429	Gallina, N; Beniston, M; Jacquet, S	Estimating future cyanobacterial occurrence and importance in lakes: a case study with Planktothrix rubescens in Lake Geneva	2017	Switzerland	Temperate	Freshwater
430	Ko, CY; Lai, CC; Hsu, HH; Shiah, FK	Decadal phytoplankton dynamics in response to episodic climatic disturbances in a subtropical deep freshwater ecosystem	2017	Taipei	Substropical	Freshwater
431	Tew, KS; Siao, YJ; Liu, PJ; Lo, WT; Meng, PJ	Taiwanese marine microbenthic algal communities remain similar yet chlorophyll a concentrations rise in mesocosms with elevated CO2 and temperature	2017	Taiwan	Substropical	Marine
432	Ko, CY; Lai, CC; Chen, TY; Hsu, HH; Shiah, FK	Typhoon effects on phytoplankton responses in a semi-closed freshwater ecosystem	2016	Taiwan	Substropical	Freshwater
433	Meng, PJ; Tew, KS; Hsieh, HY; Chen, CC	Relationship between magnitude of phytoplankton blooms and rainfall in a hyper-eutrophic lagoon: A continuous monitoring approach	2017	Taiwan	Substropical	Brackish
434	Limbu, SM; Kyewalyanga, MS	Spatial and temporal variations in environmental variables in relation to phytoplankton composition and biomass in coral reef areas around Unguja, Zanzibar, Tanzania	2015	Tanzania	Tropical	Marine
435	Sachithanandam, V; Mohan, PM; Karthik, R; Elangovan, SS; Padmavathi, G	Climate changes influence the phytoplankton bloom (prymnesiophyceae: phaeocystis spp.) in North Andaman coastal region	2020	Thailand	Tropical	Marine
436	Bucak, T; Trolle, D; Tavsanoglu, UN; Cakiroglu, AI; Ozen, A; Jeppesen, E; Beklioglu, M	Modeling the effects of climatic and land use changes on phytoplankton and water quality of the largest Turkish freshwater lake: Lake Beysehir	2018	Turkey	Temperate	Freshwater
437	Olokotum, M; Troussellier, M; Escalas, A; Hamlaoui, S; Okello, W; Semyalo, R; Humbert, JF; Bernard, C	High nutrient loading and climatic parameters influence the dominance and dissimilarity of toxigenic cyanobacteria in northern bays of Lake Victoria	2021	Uganda	Tropical	Freshwater
438	Barnes, MK; Tilstone, GH; Smyth, TJ; Widdicombe, CE; Gloel, J; Robinson, C; Kaiser, J; Suggett, DJ	Drivers and effects of Karenia mikimotoi blooms in the western English Channel	2015	United kingdom	Temperate	Marine
439	Steele, DJ; Tarran, GA; Widdicombe, CE; Woodward, EMS; Kimmance, SA; Franklin, DJ; Airs, RL	Abundance of a chlorophyll a precursor and the oxidation product hydroxychlorophyll a during seasonal phytoplankton community progression in the Western English Channel	2015	United kingdom	Temperate	Marine
440	Xie, YY; Tilstone, GH; Widdicombe, C; Woodward, EMS; Harris, C; Barnes, MK	Effect of increases in temperature and nutrients on phytoplankton community structure and photosynthesis in the western English Channel	2015	United Kingdom	Temperate	Marine
441	Keys, M; Tilstone, G; Findlay, HS; Widdicombe, CE; Lawson, T	Effects of elevated CO2 and temperature on phytoplankton community biomass, species composition and photosynthesis during an experimentally induced autumn bloom in the western English Channel	2018	United Kingdom	Temperate	Marine
442	Kelly, LA; Hassall, C	The spatial ecology of phytoplankton blooms in UK canals	2018	United Kingdom	Temperate	Marine
443	Bresnan, E; Cook, KB; Hughes, SL; Hay, SJ; Smith, K; Walsham, P; Webster, L	Seasonality of the plankton community at an east and west coast monitoring site in Scottish waters	2015	United Kingdom	Temperate	Marine
444	Elliott, JA	Predicting the impact of changing nutrient load and temperature on the phytoplankton of England's largest lake, Windermere	2012	United kingdom	Temperate	Freshwater
445	Elliott, JA; Defew, L	Modelling the response of phytoplankton in a shallow lake (Loch Leven, UK) to changes in lake retention time and water temperature	2012	United kingdom	Temperate	Freshwater
446	Elliott, JA; McElarney, YR; Allen, M	The past and future of phytoplankton in the UK's largest lake, Lough Neagh	2016	United kingdom	Temperate	Freshwater
447	Feuchtmayr, H; Pottinger, TG; Moore, A; De Ville, MM; Caillouet, L; Carter, HT; Pereira, MG; Maberly, SC	Effects of brownification and warming on algal blooms, metabolism and higher trophic levels in productive shallow lake mesocosms	2019	United Kingdom	Temperate	Freshwater
448	Moorhouse, HL; Read, DS; McGowan, S; Wagner, M; Roberts, C; Armstrong, LK; Nicholls, DJE; Wickham, HD; Hutchins, MG; Bowes, MJ	Characterisation of a major phytoplankton bloom in the River Thames (UK) using flow cytometry and high performance liquid chromatography	2018	United Kingdom	Temperate	Freshwater
449	Maier, G; Glegg, GA; Tappin, AD; Worsfold, PJ	A high resolution temporal study of phytoplankton bloom dynamics in the eutrophic Taw Estuary (SW England)	2012	United Kingdom	Temperate	Brackish
450	Lopes, JF; Ferreira, JA; Cardoso, AC; Rocha, AC	Variability of temperature and chlorophyll of the Iberian Peninsula near costal ecosystem during an upwelling event for the present climate and a future climate scenario	2012	United Kingdom and Ireland	Temperate	Freshwater
451	Haakonsson, S; Rodriguez-Gallego, L; Somma, A; Bonilla, S	Temperature and precipitation shape the distribution of harmful cyanobacteria in subtropical lotic and lentic ecosystems	2017	Uruguay	Substropical	Marine
452	Crisci, C; Terra, R; Pacheco, JP; Ghattas, B; Bidegain, M; Goyenola, G; Lagomarsino, JJ; Mendez, G; Mazzeo, N	Multi-model approach to predict phytoplankton biomass and composition dynamics in a eutrophic shallow lake governed by extreme meteorological events	2017	Uruguay	Substropical	Freshwater
453	Aubriot, L; Zabaleta, B; Bordet, F; Sienra, D; Risso, J; Achkar, M; Somma, A	Assessing the origin of a massive cyanobacterial bloom in the Rio de la Plata (2019): Towards an early warning system	2020	Uruguay	Temperate	Brackish
454	Kruk, C; Segura, AM; Nogueira, L; Alcantara, I; Calliari, D; de la Escalera, GM; Carballo, C; Cabrera, C; Sarthou, F; Scavone, P; Piccini, C	A multilevel trait-based approach to the ecological performance of Microcystis aeruginosa complex from headwaters to the ocean	2017	Uruguay	Temperate	Brackish
455	Barron, JA; Bukry, D; Addison, JA; Ager, TA	Holocene evolution of diatom and silicoflagellate paleoceanography in Slocum Arm, a fjord in southeastern Alaska	2016	USA	Polar and Subpolar	Marine
456	Harding, LW; Gallegos, CL; Perry, ES; Miller, WD; Adolf, JE; Mallonee, ME; Paerl, HW	Long-Term Trends of Nutrients and Phytoplankton in Chesapeake Bay	2015	USA	Polar and Subpolar	Brackish
457	Michaud, CA; Huffard, CL; Smith, KL; Durkin, CA	Changes in phytoplankton and biomineral content of particles during episodic fluxes to abyssal depth	2022	USA	Substropical	Marine
458	Bercel, TL; Kranz, SA	Insights into carbon acquisition and photosynthesis in Karenia brevis under a range of CO2 concentrations	2019	USA	Substropical	Marine
459	Robles-Tamayo, CM; Garcia-Morales, R; Valdez-Holguin, JE; Figueroa-Preciado, G; Herrera-Cervantes, H; Lopez-Martinez, J; Enriquez-Ocana, LF	Chlorophyll a Concentration Distribution on the Mainland Coast of the Gulf of California, Mexico	2020	USA	Substropical	Marine
460	Hakspiel-Segura, C; Martinez-Lopaz, A; Delgado-Contreras, JA; Robinson, CJ; Gomez-Gutierrez, J	Temporal variability of satellite chlorophyll-a as an ecological resilience indicator in the central region of the Gulf of California	2022	USA	Substropical	Marine
461	Foukal, NP; Thomas, AC	Biogeography and phenology of satellite-measured phytoplankton seasonality in the California current	2014	USA	Substropical	Marine
462	Putland, JN; Mortazavi, B; Iverson, RL; Wise, SW	Phytoplankton Biomass and Composition in a River-Dominated Estuary During Two Summers of Contrasting River Discharge	2014	USA	Substropical	Marine
463	Closset, I; McNair, HM; Brzezinski, MA; Krause, JW; Thamatrakoln, K; Jones, JL	Diatom response to alterations in upwelling and nutrient dynamics associated with climate forcing in the California Current System	2021	USA	Substropical	Marine
464	Kahru, M; Kudela, RM; Manzano-Sarabia, M; Mitchell, BG	Trends in the surface chlorophyll of the California Current: Merging data from multiple ocean color satellites	2012	USA	Substropical	marine
465	Coria-Monter, E; Monreal-Gomez, MA; de Leon, DAS; Duran-Campos, E	Zooplankton abundance during summer in the Bay of La Paz (southwestern Gulf of California, Mexico)	2020	USA	Substropical	Marine
466	Wingert, CJ; Cochlan, WP	Effects of ocean acidification on the growth, photosynthetic performance, and domoic acid production of the diatom Pseudo-nitzschia australis from the California Current System	2021	USA	Substropical	Marine
467	Pokrzywinski, KL; Bishop, WM; Grasso, CR; Fernando, BM; Sperry, BP; Berthold, DE; Laughinghouse, HD; Van Goethem, EM; Volk, K; Heilman, M; Getsinger, KD	Evaluation of a Peroxide-Based Algaecide for Cyanobacteria Control: A Mesocosm Trial in Lake Okeechobee, FL, USA	2022	USA	Substropical	Freshwater
468	Thomas, MK; Litchman, E	Effects of temperature and nitrogen availability on the growth of invasive and native cyanobacteria	2016	USA	Substropical	Freshwater
469	Kramer, BJ; Davis, TW; Meyer, KA; Rosen, BH; Goleski, JA; Dick, GJ; Oh, G; Gobler, CJ	Nitrogen limitation, toxin synthesis potential, and toxicity of cyanobacterial populations in Lake Okeechobee and the St. Lucie River Estuary, Florida, during the 2016 state of emergency event	2018	USA	Substropical	Brackish and freshwater
470	Reyna, NE; Hardison, AK; Liu, ZF	Influence of Major Storm Events on the Quantity and Composition of Particulate Organic Matter and the Phytoplankton Community in a Subtropical Estuary, Texas	2017	USA	Substropical	Brackish
471	Le, CF; Hu, CM; English, D; Cannizzaro, J; Kovach, C	Climate-driven chlorophyll-a changes in a turbid estuary: Observations from satellites and implications for management	2013	USA	Substropical	Brackish
472	Gobler, CJ; Koch, F; Karig, YJ; Berry, DL; Tang, YZ; Lasi, M; Walters, L; Hall, L; Miller, JD	Expansion of harmful brown tides caused by the pelagophyte, Aureoumbra lagunensis DeYoe et Stockwell, to the US east coast	2013	USA	Substropical	Brackish
473	Murrell, MC; Stanley, RS; Lehrter, JC; Hagy, JD	Plankton community respiration, net ecosystem metabolism, and oxygen dynamics on the Louisiana continental shelf: Implications for hypoxia	2013	USA	Substropical	Brackish
474	Angles, S; Jordi, A; Campbell, L	Responses of the coastal phytoplankton community to tropical cyclones revealed by high-frequency imaging flow cytometry	2015	USA	Substropical	Brackish
475	Fujiwara, A; Nishino, S; Matsuno, K; Onodera, J; Kawaguchi, Y; Hirawake, T; Suzuki, K; Inoue, J; Kikuchi, T	Changes in phytoplankton community structure during wind-induced fall bloom on the central Chukchi shelf	2018	USA	Temperate	Marine
476	Friedland, KD; Leaf, RT; Kane, J; Tommasi, D; Asch, RG; Rebuck, N; Ji, R; Large, SI; Stock, C; Saba, VS	Spring bloom dynamics and zooplankton biomass response on the US Northeast Continental Shelf	2015	USA	Temperate	Marine
477	Seto, DS; Karp-Boss, L; Wells, ML	Effects of increasing temperature and acidification on the growth and competitive success of Alexandrium catenella from the Gulf of Maine	2019	USA	Temperate	Marine
478	Williams, JJ; Beutel, M; Nurse, A; Moore, B; Hampton, SE; Saros, JE	Phytoplankton responses to nitrogen enrichment in Pacific Northwest, USA Mountain Lakes	2012	USA	Temperate	Freshwater
479	Wong, SW; Matthews, RA; Bruun, K	Phytoplankton Variation in Four Shallow High-elevation Lakes in the Upper North Fork Nooksack River Watershed of the North Cascades, Washington (USA)	2016	USA	Temperate	Freshwater
480	Dolph, CL; Hansen, AT; Finlay, JC	Flow-related dynamics in suspended algal biomass and its contribution to suspended particulate matter in an agricultural river network of the Minnesota River Basin, USA	2016	USA	Temperate	Freshwater
481	Carey, CC; Weathers, KC; Ewing, HA; Greer, ML; Cottingham, KL	Spatial and temporal variability in recruitment of the cyanobacterium Gloeotrichia echinulata in an oligotrophic lake	2014	USA	Temperate	Freshwater
482	Harding, LW; Adolf, JE; Mallonee, ME; Miller, WD; Gallegos, CL; Perry, ES; Johnson, JM; Sellner, KG; Paerl, HW	Climate effects on phytoplankton floral composition in Chesapeake Bay	2015	USA	Temperate	Marine
483	Xu, Y; Miles, T; Schofield, O	Physical processes controlling chlorophyll-a variability on the Mid-Atlantic Bight along northeast United States	2020	USA	Temperate	Marine
484	Palacios, SL; Kudela, RM; Guild, LS; Negrey, KH; Torres-Perez, J; Broughton, J	Remote sensing of phytoplankton functional types in the coastal ocean from the HyspIRI Preparatory Flight Campaign	2015	USA	Temperate	Marine
485	de Verneil, A; Franks, PJS; Ohman, MD	Frontogenesis and the Creation of Fine-Scale Vertical Phytoplankton Structure	2019	USA	Temperate	Marine
486	Taylor, AG; Goericke, R; Landry, MR; Selph, KE; Wick, DA; Roadman, MJ	Sharp gradients in phytoplankton community structure across a frontal zone in the California Current Ecosystem	2012	USA	Temperate	Marine
487	Strock, JS; Menden-Deuer, S	Temperature acclimation alters phytoplankton growth and production rates	2020	USA	Temperate	Marine
488	Wu, YP; Beardall, J; Gao, KS	Physiological Responses of a Model Marine Diatom to Fast pH Changes: Special Implications of Coastal Water Acidification	2015	USA	Temperate	Marine
489	Hayes, NM; Vanni, MJ	Microcystin concentrations can be predicted with phytoplankton biomass and watershed morphology	2017	USA	Temperate	Freshwater
490	Howard, K; Noble, P	Hydrological perturbations drive rapid shifts in phytoplankton biodiversity and population dynamics in Butte Lake (Lassen Volcanic National Park, California)	2018	USA	Temperate	Freshwater
491	Jankowski, KJ; Houser, JN; Scheuerell, MD; Smits, AP	Warmer Winters Increase the Biomass of Phytoplankton in a Large Floodplain River	2021	USA	Temperate	Freshwater
492	Leung, T; Wilkinson, GM; Swanner, ED	Iron availability allows sustained cyanobacterial blooms: a dual-lake case study	2021	USA	Temperate	Freshwater
493	Havens, KE; Beaver, JR	Zooplankton to phytoplankton biomass ratios in shallow Florida lakes: an evaluation of seasonality and hypotheses about factors controlling variability	2013	USA	Temperate	Freshwater
494	Knapp, AS; Milewski, AM	Spatiotemporal Relationships of Phytoplankton Blooms, Drought, and Rainstorms in Freshwater Reservoirs	2019	USA	Temperate	Freshwater
495	Doubek, JP; Campbell, KL; Lofton, ME; McClure, RP; Carey, CC	Hypolimnetic Hypoxia Increases the Biomass Variability and Compositional Variability of Crustacean Zooplankton Communities	2019	USA	Temperate	Freshwater
496	Wilkinson, GM; Carpenter, SR; Cole, JJ; Pace, ML; Batt, RD; Buelo, CD; Kurtzweil, JT	Early warning signals precede cyanobacterial blooms in multiple whole-lake experiments	2017	USA	Temperate	Freshwater
497	Gaskill, JA; Harris, TD; North, RL	Phytoplankton Community Response to Changes in Light: Can Glacial Rock Flour Be Used to Control Cyanobacterial Blooms?	2020	USA	Temperate	Freshwater
498	Peierls, BL; Hall, NS; Paerl, HW	Non-monotonic Responses of Phytoplankton Biomass Accumulation to Hydrologic Variability: A Comparison of Two Coastal Plain North Carolina Estuaries	2012	USA	Temperate	Brackish
499	Lehman, P	The increase of cyanobacteria and benthic diatoms over 43 years in upper San Francisco Estuary, California	2022	USA	Temperate	Brackish
500	Jiang, L; Xia, M	Modeling investigation of the nutrient and phytoplankton variability in the Chesapeake Bay outflow plume	2018	USA	Temperate	Brackish
501	Sweet, JA; Bargu, S; Morrison, WL; Parsons, M; Pathare, MG; Roberts, BJ; Soniat, TM; Stauffer, BA	Phytoplankton dynamics in Louisiana estuaries: Building a baseline to understand current and future change	2022	USA	Temperate	Brackish
502	Filippino, KC; Egerton, TA; Hunley, WS; Mulholland, MR	The Influence of Storms on Water Quality and Phytoplankton Dynamics in the Tidal James River	2016	USA	Temperate	Brackish
503	Hounshell, AG; Fegley, SR; Hall, NS; Osburn, CL; Paerl, HW	Riverine Discharge and Phytoplankton Biomass Control Dissolved and Particulate Organic Matter Dynamics over Spatial and Temporal Scales in the Neuse River Estuary, North Carolina	2021	USA	Temperate	Brackish
504	Lehman, PW; Kurobe, T; Lesmeister, S; Baxa, D; Tung, A; Teh, SJ	Impacts of the 2014 severe drought on the Microcystis bloom in San Francisco Estuary	2017	USA	Temperate	Brackish
505	Babitch, JW; Nelson, JA; Deegan, LA; Sullivan, H; Stauffer, BA	Resolving Estuarine Nitrogen Use by Phytoplankton Communities Using a Whole Ecosystem Tracer Approach	2021	USA	Temperate	Brackish
506	Paerl, HW; Hall, NS; Peierls, BL; Rossignol, KL; Joyner, AR	Hydrologic Variability and Its Control of Phytoplankton Community Structure and Function in Two Shallow, Coastal, Lagoonal Ecosystems: The Neuse and New River Estuaries, North Carolina, USA	2022	USA	Temperate	Brackish
507	Li, RJ; Li, M; Glibert, PM	Coupled Carbonate Chemistry-Harmful Algae Bloom Models for Studying Effects of Ocean Acidification on Prorocentrum minimum Blooms in a Eutrophic Estuary	2022	USA	Temperate	Brackish
508	Moisan, TA; Rufty, KM; Moisan, JR; Linkswiler, MA	Satellite Observations of Phytoplankton Functional Type Spatial Distributions, Phenology, Diversity, and Ecotones	2017	USA	Temperate	All
509	Van Oostende, N; Dunne, JP; Fawcett, SE; Ward, BB	Phytoplankton succession explains size-partitioning of new production following upwelling-induced blooms	2015	USA	Tropical	Marine
510	Lorenzoni, L; Toro-Farmer, G; Varela, R; Guzman, L; Rojas, J; Montes, E; Muller-Karger, F	Characterization of phytoplankton variability in the Cariaco Basin using spectral absorption, taxonomic and pigment data	2015	Venezuela	Tropical	Marine
511	Siswanto, E; Ye, HJ; Yamazaki, D; Tang, DL	Detailed spatiotemporal impacts of El Nino on phytoplankton biomass in the South China Sea	2017	Vietnam	Tropical	Marine
512	Ramos, JBE; Schulz, KG; Febiri, S; Riebesell, U	Photoacclimation to abrupt changes in light intensity by Phaeodactylum tricornutum and Emiliania huxleyi: the role of calcification	2012	-	Polar and Subpolar	Marine
513	Kivva, KK; Kubryakov, AA	Seasonal and Interannual Variability of Chlorophyll-a Concentration in the Bering Sea Found from Satellite Data	2021	-	Polar and Subpolar	Marine
514	Lee, SH; Ryu, J; Park, JW; Lee, D; Kwon, JI; Zhao, JP; Son, S	Improved Chlorophyll-a Algorithm for the Satellite Ocean Color Data in the Northern Bering Sea and Southern Chukchi Sea	2018	-	Polar and Subpolar	Marine
515	Sigler, MF; Stabeno, PJ; Eisner, LB; Napp, JM; Mueter, FJ	Spring and fall phytoplankton blooms in a productive subarctic ecosystem, the eastern Bering Sea, during 1995-2011	2014	-	Polar and Subpolar	Marine
516	Fujiwara, A; Hirawake, T; Suzuki, K; Eisner, L; Imai, I; Nishino, S; Kikuchi, T; Saitoh, SI	Influence of timing of sea ice retreat on phytoplankton size during marginal ice zone bloom period on the Chukchi and Bering shelves	2016	-	Polar and Subpolar	Marine
517	Wang, Y; Kang, JH; Xiang, P; Wang, WB; Lin, M	Short timeframe changes of environmental impacts on summer phytoplankton in the Chukchi Sea and surrounding areas in a regional scaling	2020	-	Polar and Subpolar	Marine
518	Cheng, W; Curchitser, E; Stock, C; Hermann, A; Cokelet, E; Mordy, C; Stabeno, P; Hervieux, G; Castruccio, F	What processes contribute to the spring and fall bloom co-variability on the Eastern Bering Sea shelf?	2016	-	Polar and Subpolar	Marine
519	Wang, Y; Xiang, P; Kang, JH; Ye, YY; Lin, GM; Yang, QL; Lin, M	Environmental controls on spatial variability of summer phytoplankton structure and biomass in the Bering Sea	2018	-	Polar and Subpolar	Marine
520	Allen, S; Henson, S; Hickman, A; Beaulieu, C; Doncaster, PC; Johns, DG	Interannual stability of phytoplankton community composition in the North-East Atlantic	2020	-	Polar and Subpolar	Marine
521	Zhang, JL; Ashjian, C; Campbell, R; Spitz, YH; Steele, M; Hill, V	The influence of sea ice and snow cover and nutrient availability on the formation of massive under-ice phytoplankton blooms in the Chukchi Sea	2015	-	Polar and Subpolar	Marine
522	Schuback, N; Schallenberg, C; Duckham, C; Maldonado, MT; Tortell, PD	Interacting Effects of Light and Iron Availability on the Coupling of Photosynthetic Electron Transport and CO2-Assimilation in Marine Phytoplankton	2015	-	Polar and Subpolar	Marine
523	Cleary, AC; Durbin, EG; Rynearson, TA; Bailey, J	Feeding by Pseudocalanus copepods in the Bering Sea: Trophic linkages and a potential mechanism of niche partitioning	2016	-	Polar and Subpolar	Marine
524	Matsuno, K; Yamaguchi, A; Nishino, S; Inoue, J; Kikuchi, T	Short-term changes in the mesozooplankton community and copepod gut pigment in the Chukchi Sea in autumn: reflections of a strong wind event	2015	-	Polar and Subpolar	Marine
525	Fujiwara, A; Hirawake, T; Suzuki, K; Imai, I; Saitoh, SI	Timing of sea ice retreat can alter phytoplankton community structure in the western Arctic Ocean	2014	-	Polar and Subpolar	Marine
526	Kikuchi, G; Abe, H; Hirawake, T; Sampei, M	Distinctive spring phytoplankton bloom in the Bering Strait in 2018: A year of historically minimum sea ice extent	2020	-	Polar and Subpolar	Marine
527	Sampaio, E; Gallo, F; Schulz, KG; Azevedo, EB; Ramos, JBE	Phytoplankton interactions can alter species response to present and future CO2 concentrations	2022	-	Polar and Subpolar	Marine
528	Connell, PE; Michel, C; Meisterhans, G; Arrigo, KR; Caron, DA	Phytoplankton and bacterial dynamics on the Chukchi Sea Shelf during the spring-summer transition	2018	-	Polar and Subpolar	Marine
529	Ko, E; Gorbunov, MY; Jung, J; Joo, HM; Lee, Y; Cho, KH; Yang, EJ; Kang, SH; Park, J	Effects of Nitrogen Limitation on Phytoplankton Physiology in the Western Arctic Ocean in Summer	2022	-	Polar and Subpolar	Marine
530	Lewis, KM; Arntsen, AE; Coupel, P; Joy-Warren, H; Lowry, KE; Matsuoka, A; Mills, MM; van Dijken, GL; Selz, V; Arrigo, KR	Photoacclimation of Arctic Ocean phytoplankton to shifting light and nutrient limitation	2018	-	Polar and Subpolar	Marine
531	Banas, NS; Zhang, JL; Campbell, RG; Sambrotto, RN; Lomas, MW; Sherr, E; Sherr, B; Ashjian, C; Stoecker, D; Lessard, EJ	Spring plankton dynamics in the Eastern Bering Sea, 1971-2050: Mechanisms of interannual variability diagnosed with a numerical model	2016	-	Polar and Subpolar	Marine
532	Liu, CL; Zhai, L; Zeeman, SI; Eisner, LB; Gann, JC; Mordy, CW; Moran, SB; Lomas, MW	Seasonal and geographic variations in modeled primary production and phytoplankton losses from the mixed layer between warm and cold years on the eastern Bering Sea shelf	2016	-	Polar and Subpolar	Marine
533	Gobler, CJ; Doherty, OM; Hattenrath-Lehmann, TK; Griffith, AW; Kang, Y; Litaker, RW	Ocean warming since 1982 has expanded the niche of toxic algal blooms in the North Atlantic and North Pacific oceans	2017	-	Polar and Subpolar	Marine
534	Gentine, JA; Conard, WM; O'Reilly, KE; Cooper, MJ; Fiorino, GE; Harrison, AM; Hein, M; Moerke, AH; Iii, CRR; Uzarski, DG; Lamberti, GA	Environmental predictors of phytoplankton chlorophyll-a in Great Lakes coastal wetlands	2022	-	Polar and Subpolar	Freshwater
535	Panigrahi, S; Nydahl, A; Anton, P; Wikner, J	Strong seasonal effect of moderate experimental warming on plankton respiration in a temperate estuarine plankton community	2013	-	Polar and Subpolar	Brackish
536	Palmer, MA; van Dijken, GL; Mitchell, BG; Seegers, BJ; Lowry, KE; Mills, MM; Arrigo, KR	Light and nutrient control of photosynthesis in natural phytoplankton populations from the Chukchi and Beaufort seas, Arctic Ocean	2013	-	Polar and Subpolar	Marine
537	Astakhov, AS; Bosin, AA; Kolesnik, AN; Obrezkova, MS	Sediment Geochemistry and Diatom Distribution in the Chukchi Sea: APPLICATION FOR BIOPRODUCTIVITY AND PALEOCEANOGRAPHY	2015	-	Polar and Subpolar	Marine
538	Daniels, CJ; Poulton, AJ; Young, JR; Esposito, M; Humphreys, MP; Ribas-Ribas, M; Tynan, E; Tyrrell, T	Species-specific calcite production reveals Coccolithus pelagicus as the key calcifier in the Arctic Ocean	2016	-	Polar and Subpolar	Marine
539	Feng, YY; Roleda, MY; Armstrong, E; Law, CS; Boyd, PW; Hurd, CL	Environmental controls on the elemental composition of a Southern Hemisphere strain of the coccolithophore Emiliania huxleyi	2017	-	Polar and Subpolar	Marine
540	Lafond, A; Leblanc, K; Legras, J; Cornet, V; Queguiner, B	The structure of diatom communities constrains biogeochemical properties in surface waters of the Southern Ocean (Kerguelen Plateau)	2020	-	Polar and Subpolar	Marine
541	Zhao, HP; Matsuoka, A; Manizza, M; Winter, A	Recent Changes of Phytoplankton Bloom Phenology in the Northern High-Latitude Oceans (2003-2020)	2022	-	Polar and Subpolar	Marine
542	Lewis, KM; Mitchell, BG; van Dijken, GL; Arrigo, KR	Regional chlorophyll a algorithms in the Arctic Ocean and their effect on satellite-derived primary production estimates	2016	-	Polar and Subpolar	Marine
543	Marchese, C; Albouy, C; Tremblay, JE; Dumont, D; D'Ortenzio, F; Vissault, S; Belanger, S	Changes in phytoplankton bloom phenology over the North Water (NOW) polynya: a response to changing environmental conditions	2017	-	Polar and Subpolar	Marine
544	Yasunaka, S; Siswanto, E; Olsen, A; Hoppema, M; Watanabe, E; Fransson, A; Chierici, M; Murata, A; Lauvset, SK; Wanninkhof, R; Takahashi, T; Kosugi, N; Omar, AM; van Heuven, S; Mathis, JT	Arctic Ocean CO2 uptake: an improved multiyear estimate of the air-sea CO2 flux incorporating chlorophyll a concentrations	2018	-	Polar and Subpolar	Marine
545	Robinson, CM; Huot, Y; Schuback, N; Ryan-Keogh, TJ; Thomalla, SJ; Antoine, D	High latitude Southern Ocean phytoplankton have distinctive bio-optical properties	2021	-	Polar and Subpolar	Marine
546	Iida, T; Odate, T	Seasonal variability of phytoplankton biomass and composition in the major water masses of the Indian Ocean sector of the Southern Ocean	2014	-	Polar and Subpolar	Marine
547	Demidov, AB; Sukhanova, IN; Belevich, TA; Flint, MV; Gagarin, VI; Sergeeva, VM; Eremeeva, EV; Fedorov, AV	Size-fractionated surface phytoplankton in the Kara and Laptev Seas: environmental control and spatial variability	2022	-	Polar and Subpolar	Marine
548	Vereshchaka, AL; Lunina, AA; Mikaelyan, AS; Meireles, JE	Surface chlorophyll concentration as a mesoplankton biomass assessment tool in the Southern Ocean region	2021	-	Polar and Subpolar	Marine
549	Prakash, P; Prakash, S; Ravichandran, M; Bhaskar, TVSU; Kumar, NA	Seasonal evolution of chlorophyll in the Indian sector of the Southern Ocean: Analyses of Bio-Argo measurements	2020	-	Polar and Subpolar	Marine
550	Dalpadado, P; Arrigo, KR; van Dijken, GL; Skjoldal, HR; Bagoien, E; Dolgov, AV; Prokopchuk, IP; Sperfeld, E	Climate effects on temporal and spatial dynamics of phytoplankton and zooplankton in the Barents Sea	2020	-	Polar and Subpolar	Marine
551	Lee, SH; Yun, MS; Kim, BK; Joo, H; Kang, SH; Kang, CK; Whitledge, TE	Contribution of small phytoplankton to total primary production in the Chukchi Sea	2022	-	Polar and Subpolar	Marine
552	Kerkar, AU; Tripathy, SC; Hughes, DJ; Sabu, P; Pandi, SR; Sarkar, A; Tiwari, M	Characterization of phytoplankton productivity and bio-optical variability in a polar marine ecosystem	2021	-	Polar and Subpolar	Marine
553	Waga, H; Hirawake, T; Fujiwara, A; Grebmeier, JM; Saitoh, SI	Impact of spatiotemporal variability in phytoplankton size structure on benthic macrofaunal distribution in the Pacific Arctic	2019	-	Polar and Subpolar	Marine
554	Ardyna, M; Mundy, CJ; Mills, MM; Oziel, L; Grondin, PL; Lacour, L; Verin, G; Van Dijken, G; Ras, J; Alou-Font, E; Babin, M; Gosselin, M; Tremblay, JE; Raimbault, P; Assmy, P; Nicolaus, M; Claustre, H; Arrigo, KR	Environmental drivers of under-ice phytoplankton bloom dynamics in the Arctic Ocean	2020	-	Polar and Subpolar	Marine
555	Takao, S; Nakaoka, SI; Hashihama, F; Shimada, K; Yoshikawa-Inoue, H; Hirawake, T; Kanda, J; Hashida, G; Suzuki, K	Effects of phytoplankton community composition and productivity on sea surface pCO(2) variations in the Southern Ocean	2020	-	Polar and Subpolar	Marine
556	Fragoso, GM; Poulton, AJ; Yashayaev, IM; Head, EJH; Purdie, DA	Spring phytoplankton communities of the Labrador Sea (2005-2014): pigment signatures, photophysiology and elemental ratios	2017	-	Polar and Subpolar	Marine
557	Wojtasiewicz, B; Trull, TW; Clementson, L; Davies, DM; Patten, NL; Schallenberg, C; Hardman-Mountford, NJ	Factors Controlling the Lack of Phytoplankton Biomass in Naturally Iron Fertilized Waters Near Heard and McDonald Islands in the Southern Ocean	2019	-	Polar and Subpolar	Marine
558	Cheah, W; McMinn, A; Griffiths, FB; Westwood, KJ; Wright, SW; Clementson, LA	Response of Phytoplankton Photophysiology to Varying Environmental Conditions in the Sub-Antarctic and Polar Frontal Zone	2013	-	Polar and Subpolar	Marine
559	Kvernvik, AC; Hoppe, CJM; Greenacre, M; Verbiest, S; Wiktor, JM; Gabrielsen, TM; Reigstad, M; Leu, E	Arctic sea ice algae differ markedly from phytoplankton in their ecophysiological characteristics	2021	-	Polar and Subpolar	Marine
560	Ardyna, M; Babin, M; Gosselin, M; Devred, E; Rainville, L; Tremblay, JE	Recent Arctic Ocean sea ice loss triggers novel fall phytoplankton blooms	2014	-	Polar and Subpolar	Marine
561	Jin, HY; Zhuang, YP; Li, HL; Chen, JF; Gao, SQ; Ji, ZQ; Zhang, Y	Response of phytoplankton community to different water types in the western Arctic Ocean surface water based on pigment analysis in summer 2008	2017	-	Polar and Subpolar	Marine
562	Gleiber, MR; Steinberg, DK; Schofield, OME	Copepod summer grazing and fecal pellet production along theWestern Antarctic Peninsula	2015	-	Polar and Subpolar	Marine
563	Olofsson, M; Wulff, A	Looking back to the future-micro- and nanoplankton diversity in the Greenland Sea	2021	-	Polar and Subpolar	Marine
564	Sugie, K; Fujiwara, A; Nishino, S; Kameyama, S; Harada, N	Impacts of Temperature, CO2, and Salinity on Phytoplankton Community Composition in the Western Arctic Ocean	2020	-	Polar and Subpolar	Marine
565	Lain, LR; Bernard, S	The Fundamental Contribution of Phytoplankton Spectral Scattering to Ocean Colour: Implications for Satellite Detection of Phytoplankton Community Structure	2022	-	Polar and Subpolar	Marine
566	Matsuno, K; Abe, Y; Yamaguchi, A; Kikuchi, T	Regional patterns and controlling factors on summer population structure of Calanus glacialis in the western Arctic Ocean	2016	-	Polar and Subpolar	Marine
567	Godet, C; Robuchon, M; Leroy, B; Cotte, C; Baudena, A; Da Silva, O; Fabri-Ruiz, S; Lo Monaco, C; Sergi, S; Koubbi, P	Matching zooplankton abundance and environment in the South Indian Ocean and Southern Ocean	2020	-	Polar and Subpolar	Marine
568	Belanger, S; Babin, M; Tremblay, JE	Increasing cloudiness in Arctic damps the increase in phytoplankton primary production due to sea ice receding	2013	-	Polar and Subpolar	Marine
569	Sezginer, Y; Suggett, DJ; Izett, RW; Tortell, PD	Irradiance and nutrient-dependent effects on photosynthetic electron transport in Arctic phytoplankton: A comparison of two chlorophyll fluorescence-based approaches to derive primary photochemistry	2021	-	Polar and Subpolar	marine
570	Nothig, EM; Bracher, A; Engel, A; Metfies, K; Niehoff, B; Peeken, I; Bauerfeind, E; Cherkasheva, A; Gabler-Schwarz, S; Hardge, K; Kilias, E; Kraft, A; Kidane, YM; Lalande, C; Piontek, J; Thomisch, K; Wurst, M	Summertime plankton ecology in Fram Strait-a compilation of long- and short-term observations	2015	-	Polar and Subpolar	Marine
571	Coupel, P; Matsuoka, A; Ruiz-Pino, D; Gosselin, M; Marie, D; Tremblay, JE; Babin, M	Pigment signatures of phytoplankton communities in the Beaufort Sea	2015	-	Polar and Subpolar	Marine
572	Mayot, N; Matrai, PA; Arjona, A; Belanger, S; Marchese, C; Jaegler, T; Ardyna, M; Steele, M	Springtime Export of Arctic Sea Ice Influences Phytoplankton Production in the Greenland Sea	2020	-	Polar and Subpolar	Marine
573	Makwinja, R; Mengistou, S; Kaunda, E; Alamirew, T	Spatial distribution of zooplankton in response to ecological dynamics in tropical shallow lake: insight from Lake Malombe, Malawi	2018	-	Polar and Subpolar	Marine
574	Balch, WM; Bowler, BC; Lubelczyk, LC; Stevens, MW	Aerial extent, composition, bio-optics and biogeochemistry of a massive under-ice algal bloom in the Arctic	2014	-	Polar and Subpolar	Marine
575	Oziel, L; Neukermans, G; Ardyna, M; Lancelot, C; Tison, JL; Wassmann, P; Sirven, J; Ruiz-Pino, D; Gascard, JC	Role for Atlantic inflows and sea ice loss on shifting phytoplankton blooms in the Barents Sea	2017	-	Polar and Subpolar	Marine
576	Dvoretsky, VG; Dvoretsky, AG	Epiplankton in the Barents sea: Summer variations of mesozooplankton biomass, community structure and diversity	2013	-	Polar and Subpolar	Marine
577	Wang, SW; Budge, SM; Iken, K; Gradinger, RR; Springer, AM; Wooller, MJ	Importance of sympagic production to Bering Sea zooplankton as revealed from fatty acid-carbon stable isotope analyses	2015	-	Polar and Subpolar	Marine
578	Wang, Y; Xiang, P; Kang, JH; Ye, YY; Lin, GM; Yang, QL; Lin, M	Microphytoplankton community structure in the western Arctic Ocean: surface layer variability of geographic and temporal considerations in summer	2018	-	Polar and Subpolar	Marine
579	Coello-Camba, A; Agusti, S	Thermal Thresholds of Phytoplankton Growth in Polar Waters and Their Consequences for a Warming Polar Ocean	2017	-	Polar and Subpolar	Marine
580	Weber, C; Olesen, AKJ; Krock, B; Lundholm, N	Salinity, a climate-change factor affecting growth, domoic acid and isodomoic acid C content in the diatom Pseudo-nitzschia seriata (Bacillariophyceae)	2021	-	Polar and Subpolar	Marine
581	Piedade, GJ; Wesdorp, EM; Montenegro-Borbolla, E; Maat, DS; Brussaard, CPD	Influence of Irradiance and Temperature on the Virus MpoV-45T Infecting the Arctic Picophytoplankter Micromonas polaris	2018	-	Polar and Subpolar	Marine
582	Sala-Perez, M; Alpermann, TJ; Krock, B; Tillmann, U	Growth and bioactive secondary metabolites of arctic Protoceratium reticulatum (Dinophyceae)	2016	-	Polar and Subpolar	Marine
583	Bergstrom, AK; Karlsson, J; Karlsson, D; Vrede, T	Contrasting plankton stoichiometry and nutrient regeneration in northern arctic and boreal lakes	2018	-	Polar and Subpolar	Freshwater
584	Cui, DY; Wang, JT; Tan, LJ	Response of Phytoplankton Community Structure and Size-Fractionated Chlorophyll a in an Upwelling Simulation Experiment in the Western South China Sea	2016	-	Substropical	Marine
585	Wang, YT; Xiu, P	Typhoon footprints on ocean surface temperature and chlorophyll-a in the South China Sea	2022	-	Substropical	Marine
586	Silva, GSD; Garcia, CAE	Evaluation of ocean chlorophyll-a remote sensing algorithms using in situ fluorescence data in Southern Brazilian Coastal Waters	2021	-	Substropical	Marine
587	Fernandez-Gonzalez, C; Tarran, GA; Schuback, N; Woodward, EMS; Aristegui, J; Maranon, E	Phytoplankton responses to changing temperature and nutrient availability are consistent across the tropical and subtropical Atlantic	2022	-	Substropical	Marine
588	Louropoulou, E; Gledhill, M; Browningi, TJ; Desai, DK; Barraqueta, JLM; Tonnard, M; Sarthou, G; Planquette, H; Bowie, AR; Schmitz, RA; LaRoche, J; Achterberg, EP	Regulation of the Phytoplankton Heme b Iron Pool During the North Atlantic Spring Bloom	2019	-	Substropical	Marine
589	Aghashariatmadari, Z; Golmohammadian, H; Shariatmadari, Z; Mohebbi, F; Bazrafshan, J	Satellite-Based Monitoring of the Algal Communities of Aras Dam Reservoir: Meteorological Dependence Analysis and the Footprint of COVID-19 Pandemic Lockdown on the Eutrophication Status	2022	-	Substropical	Freshwater
590	Carney, RL; Seymour, JR; Westhorpe, D; Mitrovic, SM	Lotic bacterioplankton and phytoplankton community changes under dissolved organic-carbon amendment: evidence for competition for nutrients	2016	-	Substropical	Brackish
591	Agusti, S; Lubian, LM; Moreno-Ostos, E; Estrada, M; Duarte, CM	Projected Changes in Photosynthetic Picoplankton in a Warmer Subtropical Ocean	2021	-	Substropical	Marine
592	Everett, JD; Baird, ME; Roughan, M; Suthers, IM; Doblin, MA	Relative impact of seasonal and oceanographic drivers on surface chlorophyll a along a Western Boundary Current	2014	-	Subtropical	Marine
593	El Hourany, R; Mejia, C; Faour, G; Crepon, M; Thiria, S	Evidencing the Impact of Climate Change on the Phytoplankton Community of the Mediterranean Sea Through a Bioregionalization Approach	2021	-	Subtropical	Marine
594	Sukenik, A; Hadas, O; Kaplan, A; Quesada, A	Invasion of Nostocales (cyanobacteria) to subtropical and temperate freshwater lakes - physiological, regional, and global driving forces	2012	-	Subtropical	Freshwater
595	Brotas, V; Tarran, GA; Veloso, V; Brewin, RJW; Woodward, EMS; Airs, R; Beltran, C; Ferreira, A; Groom, SB	Complementary Approaches to Assess Phytoplankton Groups and Size Classes on a Long Transect in the Atlantic Ocean	2022	-	Temperate	Marine
596	Fulton, JM; Arthur, MA; Freeman, KH	Black Sea nitrogen cycling and the preservation of phytoplankton delta N-15 signals during the Holocene	2012	-	Temperate	Marine
597	Bandara, T; Brugel, S; Andersson, A; Lau, DCP	Seawater browning alters community composition and reduces nutritional quality of plankton in a subarctic marine ecosystem	2022	-	Temperate	Marine
598	Karlson, AML; Gorokhova, E; Elmgren, R	Nitrogen Fixed by Cyanobacteria Is Utilized by Deposit-Feeders	2014	-	Temperate	Marine
599	Agirbas, E; Feyzioglu, AM; Kopuz, U	Seasonal Changes of Phytoplankton Chlorophyll a, Primary Production and their Relation in the Continental Shelf Area of the South Eastern Black Sea	2012	-	Temperate	Marine
600	Park, KA; Park, JE; Kang, CK	Satellite-Observed Chlorophyll-a Concentration Variability in the East Sea (Japan Sea): Seasonal Cycle, Long-Term Trend, and Response to Climate Index	2022	-	Temperate	Marine
601	Agirbas, E; Feyzioglu, AM; Aytan, U; Valente, A; Yildiz, I	Are trends in SST, surface Chlorophyll-a, primary production and wind stress similar or different over the decadal scale in the south-eastern Black Sea?	2015	-	Temperate	Marine
602	Siswanto, E; Honda, MC; Matsumoto, K; Sasai, Y; Fujiki, T; Sasaoka, K; Saino, T	Sixteen-year phytoplankton biomass trends in the northwestern Pacific Ocean observed by the SeaWiFS and MODIS ocean color sensors	2016	-	Temperate	Marine
603	Brewin, RJW; Ciavatta, S; Sathyendranath, S; Skakala, J; Bruggeman, J; Ford, D; Platt, T	The Influence of Temperature and Community Structure on Light Absorption by Phytoplankton in the North Atlantic	2019	-	Temperate	Marine
604	Wasmund, N; Nausch, G; Gerth, M; Busch, S; Burmeister, C; Hansen, R; Sadkowiak, B	Extension of the growing season of phytoplankton in the western Baltic Sea in response to climate change	2017	-	Temperate	Marine
605	Groetsch, PMM; Simis, SGH; Eleveld, MA; Peters, SWM	Spring blooms in the Baltic Sea have weakened but lengthened from 2000 to 2014	2016	-	Temperate	Marine
606	Agirbas, E; Koca, L; Aytan, U	Spatio-temporal pattern of phytoplankton and pigment composition in surface waters of south-eastern Black Sea	2017	-	Temperate	Marine
607	Stelmakh, LV	THE ORGANIC CARBON-TO - CHLOROPHYLL RATIO AS A NECESSARY PARAMETER FOR ESTIMATING THE BLACK SEA PHYTOPLANKTON BIOMASS FROM SATELLITE DATA	2020	-	Temperate	Marine
608	Agirbas, E; Tilstone, G; Feyzioglu, AM	Contrasting Wind Regimes Cause Differences in Primary Production in the Black Sea Eastern and Western Gyres	2017	-	Temperate	Marine
609	Spilling, K; Asmala, E; Haavisto, N; Haraguchi, L; Kraft, K; Lehto, AM; Lewandowska, AM; Norkko, J; Piiparinen, J; Seppala, J; Vanharanta, M; Vehmaa, A; Ylostalo, P; Tamminen, T	Brownification affects phytoplankton community composition but not primary productivity in eutrophic coastal waters: A mesocosm experiment in the Baltic Sea	2022	-	Temperate	Marine
610	Lomas, MW; Eisner, LB; Gann, J; Baer, SE; Mordy, CW; Stabeno, PJ	Time-series of direct primary production and phytoplankton biomass in the southeastern Bering Sea: responses to cold and warm stanzas	2020	-	Temperate	Marine
611	Wang, WM; Zhang, H; Chen, HJ; Zhuang, YY; Huang, YS; Liu, GX	Effects of Asian dust input on eukaryotic phytoplankton community structure in the open areas in the Northwestern Pacific Ocean	2019	-	Temperate	Marine
612	Stelmakh, LV; Mansurova, IM	Physiological Mechanism of Dinoflagellate Survival under a Biogenic Limitation	2021	-	Temperate	Marine
613	Yunev, O; Carstensen, J; Stelmakh, L; Belokopytov, V; Suslin, V	Temporal changes of phytoplankton biomass in the western Black Sea shelf waters: Evaluation by satellite data (1998-2018)	2022	-	Temperate	Marine
614	Biermann, A; Engel, A; Riebesell, U	Changes in organic matter cycling in a plankton community exposed to warming under different light intensities	2014	-	Temperate	Marine
615	Tamm, M; Laas, P; Freiberg, R; Noges, P; Noges, T	Parallel assessment of marine autotrophic picoplankton using flow cytometry and chemotaxonomy	2018	-	Temperate	Marine
616	Friedland, KD; Record, NR; Asch, RG; Kristiansen, T; Saba, VS; Drinkwater, KF; Henson, S; Leaf, RT; Morse, RE; Johns, DG; Large, SI; Hjollo, SS; Nye, JA; Alexander, MA; Ji, RB	Seasonal phytoplankton blooms in the North Atlantic linked to the overwintering strategies of copepods	2016	-	Temperate	Marine
617	Ferreira, A; Stramski, D; Garcia, CAE; Garcia, VMT; Ciotti, AM; Mendes, CRB	Variability in light absorption and scattering of phytoplankton in Patagonian waters: Role of community size structure and pigment composition	2013	-	Temperate	Marine
618	Mousing, EA; Andersen, TJ; Ellegaard, M	Changes in the Abundance and Species Composition of Phytoplankton in the Last 150 Years in the Southern Black Sea	2013	-	Temperate	Marine
619	Yunev, OA; Velikova, V; Carstensen, J	Effects of changing nutrient inputs on the ratio of small pelagic fish stock and phytoplankton biomass in the Black Sea	2017	-	Temperate	Marine
620	Mikaelyan, AS; Chasovnikov, VK; Kubryakov, AA; Stanichny, SV	Phenology and drivers of the winter-spring phytoplankton bloom in the open Black Sea: The application of Sverdrup's hypothesis and its refinements	2017	-	Temperate	Marine
621	Sliwinska-Wilczewska, S; Cieszynska, A; Konik, M; Maculewicz, J; Latala, A	Environmental drivers of bloom-forming cyanobacteria in the Baltic Sea: Effects of salinity, temperature, and irradiance	2019	-	Temperate	Marine
622	Gohin, F; Bryere, P; Griffiths, JW	The exceptional surface turbidity of the North-West European shelf seas during the stormy 2013-2014 winter: Consequences for the initiation of the phytoplankton blooms?	2015	-	Temperate	Marine
623	Gross, E; Di Pane, J; Boersma, M; Meunier, CL	River discharge-related nutrient effects on North Sea coastal and offshore phytoplankton communities	2022	-	Temperate	Marine
624	Mousing, EA; Ellegaard, M; Richardson, K	Global patterns in phytoplankton community size structure-evidence for a direct temperature effect	2014	-	Temperate	Marine
625	Listmann, L; Kerl, F; Martens, N; Schaum, CE	Differences in Carbon Acquisition Could Explain Adaptive Responses in a Baltic Sea Pico-Phytoplankton	2021	-	Temperate	Marine
626	Barnett, ML; Kemp, AES; Hickman, AE; Purdie, DA	Shelf sea subsurface chlorophyll maximum thin layers have a distinct phytoplankton community structure	2019	-	Temperate	Marine
627	Sala-Perez, M; Lockyer, AE; Anesio, A; Leroy, SAG	Effect of temperature and salinity on the growth and cell size of the first cultures of Gymnodinium aureolum from the Black Sea	2021	-	Temperate	Marine
628	Olofsson, M; Torstensson, A; Karlberg, M; Steinhoff, FS; Dinasquet, J; Riemann, L; Chierici, M; Wulff, A	Limited response of a spring bloom community inoculated with filamentous cyanobacteria to elevated temperature and pCO(2)	2019	-	Temperate	Marine
629	Kremp, A; Oja, J; LeTortorec, AH; Hakanen, P; Tahvanainen, P; Tuimala, J; Suikkanen, S	Diverse seed banks favour adaptation of microalgal populations to future climate conditions	2016	-	Temperate	Marine
630	Eigemann, F; Schwartke, M; Schulz-Vogt, H	Niche separation of Baltic Sea cyanobacteria during bloom events by species interactions and autecological preferences	2018	-	Temperate	Marine
631	Krueger-Hadfield, SA; Balestreri, C; Schroeder, J; Highfield, A; Helaouet, P; Allum, J; Moate, R; Lohbeck, KT; Miller, PI; Riebesell, U; Reusch, TBH; Rickaby, REM; Young, J; Hallegraeff, G; Brownlee, C; Schroeder, DC	Genotyping an Emiliania huxleyi (prymnesiophyceae) bloom event in the North Sea reveals evidence of asexual reproduction	2014	-	Temperate	Marine
632	Silkin, V; Fedorov, A; Flynn, KJ; Paramonov, L; Pautova, L	Protoplasmic streaming of chloroplasts enables rapid photoacclimation in large diatoms	2021	-	Temperate	Marine
633	Hrycik, AR; Isles, PDF; Adrian, R; Albright, M; Bacon, LC; Berger, SA; Bhattacharya, R; Grossart, HP; Hejzlar, J; Hetherington, AL; Knoll, LB; Laas, A; McDonald, CP; Merrell, K; Nejstgaard, JC; Nelson, K; Noges, P; Paterson, AM; Pilla, RM; Robertson, DM; Rudstam, LG; Rusak, JA; Sadro, S; Silow, EA; Stockwell, JD; Yao, HX; Yokota, K; Pierson, DC	Earlier winter/spring runoff and snowmelt during warmer winters lead to lower summer chlorophyll-a in north temperate lakes	2021	-	Temperate	Freshwater
634	Rose, V; Rollwagen-Bollens, G; Bollens, SM; Zimmerman, J	Seasonal and interannual variation in lower Columbia River phytoplankton (2005-2018): environmental variability and a decline in large bloom-forming diatoms	2021	-	Temperate	Freshwater
635	Hardenbicker, P; Rolinski, S; Weitere, M; Fischer, H	Contrasting long-term trends and shifts in phytoplankton dynamics in two large rivers	2014	-	Temperate	Freshwater
636	Nicolle, A; Hallgren, P; von Einem, J; Kritzberg, ES; Graneli, W; Persson, A; Bronmark, C; Hansson, LA	Predicted warming and browning affect timing and magnitude of plankton phenological events in lakes: a mesocosm study	2022	-	Temperate	Freshwater
637	Kuefner, W; Ossyssek, S; Geist, J; Raeder, U	The silicification value: a novel diatom-based indicator to assess climate change in freshwater habitats	2019	-	Temperate	Freshwater
638	Savadova, K; Mazur-Marzec, H; Karosiene, J; Kasperoviciene, J; Vitonyte, I; Torunska-Sitarz, A; Koreiviene, J	Effect of Increased Temperature on Native and Alien Nuisance Cyanobacteria from Temperate Lakes: An Experimental Approach	2018	-	Temperate	Freshwater
639	Vaiciute, D; Bucas, M; Bresciani, M; Dabuleviciene, T; Gintauskas, J; Mezine, J; Tiskus, E; Umgiesser, G; Morkunas, J; De Santi, F; Bartoli, M	Hot moments and hotspots of cyanobacteria hyperblooms in the Curonian Lagoon (SE Baltic Sea) revealed via remote sensing-based retrospective analysis	2021	-	Temperate	Brackish
640	Pingree, RD; Garcia-Soto, C	Plankton blooms, ocean circulation and the European slope current: Response to weather and climate in the Bay of Biscay and W English Channel (NE Atlantic)	2014	-	Temperate	Marine
641	Everett, JD; Baird, ME; Roughan, M; Suthers, IM; Doblin, MA	Relative impact of seasonal and oceanographic drivers on surface chlorophyll a along a Western Boundary Current	2014	-	Temperate	Marine
642	El Hourany, R; Mejia, C; Faour, G; Crepon, M; Thiria, S	Evidencing the Impact of Climate Change on the Phytoplankton Community of the Mediterranean Sea Through a Bioregionalization Approach	2021	-	Temperate	Marine
643	Sukenik, A; Hadas, O; Kaplan, A; Quesada, A	Invasion of Nostocales (cyanobacteria) to subtropical and temperate freshwater lakes - physiological, regional, and global driving forces	2012	-	Temperate	Freshwater
644	Leles, SG; Bruggeman, J; Polimene, L; Blackford, J; Flynn, KJ; Mitra, A	Differences in physiology explain succession of mixoplankton functional types and affect carbon fluxes in temperate seas	2021	-	Temperate	Marine
645	Fanesi, A; Wagner, H; Becker, A; Wilhelm, C	Temperature affects the partitioning of absorbed light energy in freshwater phytoplankton	2016	-	Temperate	Freshwater
646	Sweijd, NA; Smit, AJ	Trends in sea surface temperature and chlorophyll-a in the seven African Large Marine Ecosystems	2020	-	Temperate	Marine
647	Lee, D; Son, S; Joo, H; Kim, K; Kim, MJ; Jang, HK; Yun, MS; Kang, CK; Lee, SH	Estimation of the Particulate Organic Carbon to Chlorophyll-a Ratio Using MODIS-Aqua in the East/Japan Sea, South Korea	2020	-	Temperate	Marine
648	Novoa, S; Chust, G; Sagarminaga, Y; Revilla, M; Borja, A; Franco, J	Water quality assessment using satellite-derived chlorophyll-a within the European directives, in the southeastern Bay of Biscay	2012	-	Temperate	Marine
649	Kotta, D; Kitsiou, D	CHLOROPHYLL-A VARIATIONS IN TERMS OF METEOROLOGICAL FORCING: THE RHODES GYRE AND THE CYCLADES REGION	2022	-	Temperate	Marine
650	Luo, CH; Wang, WC; Sheng, LF; Zhou, Y; Hu, ZY; Qu, WJ; Li, XD; Hai, SF	Influence of polluted dust on chlorophyll-a concentration and particulate organic carbon in the subarctic North Pacific Ocean based on satellite observation and the WRF-Chem simulation	2020	-	Temperate	Marine
651	Siswanto, E; Honda, MC; Sasai, Y; Sasaoka, K; Saino, T	Meridional and seasonal footprints of the Pacific Decadal Oscillation on phytoplankton biomass in the northwestern Pacific Ocean	2016	-	Temperate	Marine
652	Chiswell, SM; Bradford-Grieve, J; Hadfield, MG; Kennan, SC	Climatology of surface chlorophyll a, autumn-winter and spring blooms in the southwest Pacific Ocean	2013	-	Temperate	Marine
653	Bae, H; Lee, D; Kang, JJ; Lee, JH; Jo, N; Kim, K; Jang, HK; Kim, MJ; Kwon, JI; Lee, SH	Satellite-Derived Protein Concentration of Phytoplankton in the Southwestern East/Japan Sea	2021	-	Temperate	Marine
654	Ferreira, A; Garrido-Amador, P; Brito, AC	Disentangling Environmental Drivers of Phytoplankton Biomass off Western Iberia	2019	-	Temperate	Marine
655	Meng, XL; Yao, FM; Zhang, JH; Liu, Q; Liu, Q; Shi, LM; Zhang, D	Impact of dust deposition on phytoplankton biomass in the Northwestern Pacific: A long-term study from 1998 to 2020	2022	-	Temperate	Marine
656	Jo, CO; Park, S; Kim, YH; Park, KA; Park, JJ; Park, MK; Li, S; Kim, JY; Park, JE; Kim, JY; Kim, KR	Spatial distribution of seasonality of SeaWiFS chlorophyll-a concentrations in the East/Japan Sea	2014	-	Temperate	Marine
657	Navarro, G; Caballero, I; Prieto, L; Vazquez, A; Flecha, S; Huertas, IE; Ruiz, J	Seasonal-to-interannual variability of chlorophyll-a bloom timing associated with physical forcing in the Gulf of Cadiz	2012	-	Temperate	Marine
658	Ferreira, A; Brotas, V; Palma, C; Borges, C; Brito, AC	Assessing Phytoplankton Bloom Phenology in Upwelling-Influenced Regions Using Ocean Color Remote Sensing	2021	-	Temperate	Marine
659	Krug, LA; Platt, T; Sathyendranath, S; Barbosa, AB	Unravelling region specific environmental drivers of phytoplankton across a complex marine domain (off SW Iberia)	2017	-	Temperate	Marine
660	Le, CF; Wu, SY; Hu, CM; Beck, MW; Yang, XC	Phytoplankton decline in the eastern North Pacific transition zone associated with atmospheric blocking	2019	-	Temperate	Marine
661	Ferreira, A; Dias, J; Brotas, V; Brito, AC	A perfect storm: An anomalous offshore phytoplankton bloom event in the NE Atlantic (March 2009)	2022	-	Temperate	Marine
662	Sa, C; D'Alimonte, D; Brito, AC; Kajiyama, T; Mendes, CR; Vitorino, J; Oliveira, PB; da Silva, JCB; Brotas, V	Validation of standard and alternative satellite ocean-color chlorophyll products off Western Iberia	2015	-	Temperate	Marine
663	Kang, JJ; Joo, H; Lee, JH; Lee, JH; Lee, HW; Lee, D; Kang, CK; Yun, MS; Lee, SH	Comparison Comparison of biochemical compositions of phytoplankton during spring and fall seasons in the northern East/Japan Sea	2017	-	Temperate	Marine
664	Chen, C; Mao, ZH; Han, GQ; Zhu, QK; Gong, F; Wang, TY	Latitudinal and interannual variations of the spring phytoplankton bloom peak in the East Asian marginal seas	2016	-	Temperate	Marine
665	Mozetic, P; France, J; Kogovsek, T; Talaber, I; Malej, A	Plankton trends and community changes in a coastal sea (northern Adriatic): Bottom-up vs. top-down control in relation to environmental drivers	2012	-	Temperate	Marine
666	Bellacicco, M; Volpe, G; Colella, S; Pitarch, J; Santoleri, R	Influence of photoacclimation on the phytoplankton seasonal cycle in the Mediterranean Sea as seen by satellite	2016	-	Temperate	Marine
667	Krug, LA; Platt, T; Sathyendranath, S; Barbosa, AB	Patterns and drivers of phytoplankton phenology off SW Iberia: A phenoregion based perspective	2018	-	Temperate	Marine
668	Zhong, YP; Laws, EA; Zhuang, JF; Wang, JX; Wang, PX; Zhang, CY; Liu, X; Huang, BQ	Responses of phytoplankton communities driven by differences of source water intrusions in the El Nino and La Nina events in the Taiwan Strait during the early spring	2022	-	Temperate	Marine
669	Aulicino, G; Cesarano, C; Zerrouki, M; Ruiz, S; Budillon, G; Cotroneo, Y	On the use of ABACUS high resolution glider observations for the assessment of phytoplankton ocean biomass from CMEMS model products	2021	-	Temperate	Marine
670	Salgado-Hernanz, PM; Racault, MF; Font-Munoz, JS; Basterretxea, G	Trends in phytoplankton phenology in the Mediterranean Sea based on ocean-colour remote sensing	2019	-	Temperate	Marine
671	Lee, D; Kang, JJ; Jo, N; Kim, K; Jang, HK; Kim, MJ; Kim, Y; Park, S; Son, S; Kwon, JI; Yun, MS; Kang, CK; Lee, SH	Variations in Phytoplankton Primary Production Driven by the Pacific Decadal Oscillation in the East/Japan Sea	2022	-	Temperate	Marine
672	Hasegawa, T; Kitajima, S; Kiyomoto, Y	Phytoplankton Distribution in the Kuroshio Region of the Southern East China Sea in Early Spring	2019	-	Temperate	Marine
673	El Hourany, R; Saab, MAA; Faour, G; Mejia, C; Crepon, M; Thiria, S	Phytoplankton Diversity in the Mediterranean Sea From Satellite Data Using Self-Organizing Maps	2019	-	Temperate	Marine
674	Zhang, YF; Wang, XT; Yin, KD	Spatial contrast in phytoplankton, bacteria and microzooplankton grazing between the eutrophic Yellow Sea and the oligotrophic South China Sea	2018	-	Temperate	Marine
675	Navarro, G; Almaraz, P; Caballero, I; Vazquez, A; Huertas, IE	Reproduction of Spatio-Temporal Patterns of Major Mediterranean Phytoplankton Groups from Remote Sensing OC-CCI Data	2017	-	Temperate	Marine
676	Bhavya, PS; Kang, JJ; Jang, HK; Joo, H; Lee, JH; Lee, JH; Park, JW; Kim, K; Kim, HC; Lee, SH	The Contribution of Small Phytoplankton Communities to the Total Dissolved Inorganic Nitrogen Assimilation Rates in the East/Japan Sea: An Experimental Evaluation	2020	-	Temperate	Marine
677	Tang, QQ; Yang, J; Sun, D	Functional diversity of copepod assemblages along a basin-scale latitudinal gradient in the North Pacific Ocean	2022	-	Temperate	Marine
678	Simo, R; Salo, V; Almeda, R; Movilla, J; Trepat, I; Saiz, E; Calbet, A	The quantitative role of microzooplankton grazing in dimethylsulfide (DMS) production in the NW Mediterranean	2018	-	Temperate	Marine
679	Lee, Y; Choi, JK; Youn, S; Roh, S	Influence of the physical forcing of different water masses on the spatial and temporal distributions of picophytoplankton in the northern East China Sea	2014	-	Temperate	Marine
680	Kremp, A; Godhe, A; Egardt, J; Dupont, S; Suikkanen, S; Casabianca, S; Penna, A	Intraspecific variability in the response of bloom-forming marine microalgae to changed climate conditions	2012	-	Temperate	Marine
681	Bettencourt, J; Rossi, V; Renault, L; Haynes, P; Morel, Y; Garcon, V	Effects of upwelling duration and phytoplankton growth regime on dissolved-oxygen levels in an idealized Iberian Peninsula upwelling system	2020	-	Temperate	Marine
682	Gladan, ZN; Matic, F; Arapov, J; Skejic, S; Buzancic, M; Bakrac, A; Straka, M; Dekneudt, Q; Grbec, B; Garber, R; Nazlic, N	The relationship between toxic phytoplankton species occurrence and environmental and meteorological factors along the Eastern Adriatic coast	2020	-	Temperate	Marine
683	Wang, XX; Fu, FX; Qu, PP; Kling, JD; Jiang, HB; Gao, YH; Hutchins, DA	How will the key marine calcifier Emiliania huxleyi respond to a warmer and more thermally variable ocean?	2019	-	Temperate	Marine
684	Free, G; Bresciani, M; Pinardi, M; Simis, S; Liu, XH; Albergel, C; Giardino, C	Investigating lake chlorophyll-a responses to the 2019 European double heatwave using satellite remote sensing	2022	-	Temperate	Freshwater
685	Donis, D; Mantzouki, E; McGinnis, DF; Vachon, D; Gallego, I; Grossart, HP; Domis, LND; Teurlincx, S; Seelen, L; Lurling, M; Verstijnen, Y; Maliaka, V; Fonvielle, J; Visser, PM; Verspagen, J; van Herk, M; Antoniou, MG; Tsiarta, N; McCarthy, V; Perello, VC; Machado-Vieira, D; de Oliveira, AG; Maronic, DS; Stevic, F; Pfeiffer, TZ; Vucelic, IB; Zutinic, P; Udovic, MG; Blaha, L; GeriS, R; Fankova, M; …	Stratification strength and light climate explain variation in chlorophyll a at the continental scale in a European multilake survey in a heatwave summer	2021	-	Temperate	Freshwater
686	Agusti, S; Lubian, LM; Moreno-Ostos, E; Estrada, M; Duarte, CM	Projected Changes in Photosynthetic Picoplankton in a Warmer Subtropical Ocean	2021	-	Tropical	Marine
687	Rebekah, S; Inamdar, AB; Gedam, SS	LONG-TIME-SCALE INVESTIGATION OF PHYTOPLANKTON BIOMASS THROUGH RECONSTRUCTED CHLOROPHYLL-A DATA USING DINEOF METHOD	2019	-	Tropical	Marine
688	Al-Naimi, N; Raitsos, DE; Ben-Hamadou, R; Soliman, Y	Evaluation of Satellite Retrievals of Chlorophyll-a in the Arabian Gulf	2016	-	Tropical	Marine
689	Gao, S; Wang, H; Liu, GM; Li, H	Spatio-temporal variability of chlorophyll a and its responses to sea surface temperature, winds and height anomaly in the western South China Sea	2013	-	Tropical	Marine
690	Siswanto, E; Horii, T; Iskandar, I; Gaol, JL; Setiawan, RY; Susanto, RD	Impacts of climate changes on the phytoplankton biomass of the Indonesian Maritime Continent	2020	-	Tropical	marine
691	Da, ND; Foltz, GR; Balaguru, K	Observed Global Increases in Tropical Cyclone-Induced Ocean Cooling and Primary Production	2021	-	Tropical	Marine
692	Li, WZ; El-Askary, H; Qurban, MA; Proestakis, E; Garay, MJ; Kalashnikova, OV; Amiridis, V; Gkikas, A; Marinou, E; Piechota, T; Manikandan, KP	An Assessment of Atmospheric and Meteorological Factors Regulating Red Sea Phytoplankton Growth	2018	-	Tropical	Marine
693	Liu, X; Wang, J; Cheng, XH; Du, Y	Abnormal upwelling and chlorophyll-a concentration off South Vietnam in summer 2007	2012	-	Tropical	Marine
694	Li, T; Bai, Y; Chen, XY; Zhu, QK; Gong, F; Wang, DF	Longtime variation of phytoplankton in the South China Sea from the perspective of carbon fixation	2017	-	Tropical	Marine
695	Fernandes, V; Bogati, K	Analysis of Bacteria-Phytoplankton relationships at three discrete locations in the Eastern Arabian Sea during winter	2022	-	Tropical	Marine
696	Gittings, JA; Brewin, RJW; Raitsos, DE; Kheireddine, M; Ouhssain, M; Jones, BH; Hoteit, I	Remotely sensing phytoplankton size structure in the Red Sea	2019	-	Tropical	Marine
697	Zhou, YP; Hu, B; Zhao, WH; Cui, DY; Tan, LJ; Wang, JT	Effects of increasing nutrient disturbances on phytoplankton community structure and biodiversity in two tropical seas	2018	-	Tropical	Marine
698	Sharma, P; Singh, A; Marinov, I; Kostadinov, T	Contrasting ENSO Types With Satellite-Derived Ocean Phytoplankton Biomass in the Tropical Pacific	2019	-	Tropical	Marine
699	Cui, DY; Wang, JT; Tan, LJ; Dong, ZY	Impact of atmospheric wet deposition on phytoplankton community structure in the South China Sea	2016	-	Tropical	Marine
700	Kheireddine, M; Mayot, N; Ouhssain, M; Jones, BH	Regionalization of the Red Sea Based on Phytoplankton Phenology: A Satellite Analysis	2021	-	Tropical	Marine
701	Zheng, WD; Zhou, W; Cao, WX; Liu, YP; Wang, GF; Deng, L; Li, C; Zhang, Y; Zeng, K	Vertical Variability of Total and Size-Partitioned Phytoplankton Carbon in the South China Sea	2021	-	Tropical	Marine
702	Jin, P; Gao, G; Liu, X; Li, FT; Tong, SY; Ding, JC; Zhong, ZH; Liu, NN; Gao, KS	Contrasting Photophysiological Characteristics of Phytoplankton Assemblages in the Northern South China Sea	2016	-	Tropical	Marine
703	Gregg, WW; Rousseaux, CS	Decadal trends in global pelagic ocean chlorophyll: A new assessment integrating multiple satellites, in situ data, and models	2014	-	Tropical	Marine
704	Kuttippurath, J; Sunanda, N; Martin, MV; Chakraborty, K	Tropical storms trigger phytoplankton blooms in the deserts of north Indian Ocean	2021	-	Tropical	Marine
705	Dang, XY; Chen, XY; Bai, Y; He, XQ; Chen, CTA; Li, T; Pan, DL; Zhang, ZK	Impact of ENSO events on phytoplankton over the Sulu Ridge	2020	-	Tropical	Marine
706	Zoljoodi, M; Moradi, M; Moradi, N	Seasonal and interannual cycles of total phytoplankton phenology metrics in the Persian Gulf using ocean color remote sensing	2022	-	Tropical	Marine
707	Huang, K; Xue, HJ; Chai, F; Wang, DX; Xiu, P; Xie, Q; Wu, Y; Liao, XM; Ma, WT; Yao, JL; Zhou, W	Inter-annual variability of biogeography-based phytoplankton seasonality in the Arabian Sea during 1998-2017	2022	-	Tropical	Marine
708	Gittings, JA; Raitsos, DE; Racault, MF; Brewin, RJW; Pradhan, Y; Sathyendranath, S; Platt, T	Seasonal phytoplankton blooms in the Gulf of Aden revealed by remote sensing	2017	-	Tropical	Marine
709	Raitsos, DE; Pradhan, Y; Brewin, RJW; Stenchikov, G; Hoteit, I	Remote Sensing the Phytoplankton Seasonal Succession of the Red Sea	2013	-	Tropical	Marine
710	Sarma, NS; Baliarsingh, SK; Pandi, SR; Lotliker, AA; Samanta, A	Noctiluca blooms intensify when northwesterly winds complement northeasterlies in the northern Arabian Sea: Possible implications	2022	-	Tropical	Marine
711	Mai, GM; Liu, JH; Xia, XM; Pang, XY; Li, BK; Yu, LH; Tan, YH; Song, XY; Li, G	Acutely Rising Temperature Reduces Photosynthetic Capacity of Phytoplankton Assemblages in Tropical Oceans: A Large-Scale Investigation	2021	-	Tropical	Marine
712	Hu, QW; Chen, XY; He, XQ; Bai, Y; Zhong, QW; Gong, F; Zhu, QK; Pan, DL	Seasonal Variability of Phytoplankton Biomass Revealed by Satellite and BGC-Argo Data in the Central Tropical Indian Ocean	2022	-	Tropical	Marine
713	Tian, F; Zhang, RH; Wang, XJ	Coupling ocean-atmosphere intensity determines ocean chlorophyll-induced SST change in the tropical Pacific	2021	-	Tropical	Marine
714	Roy, S; Broomhead, DS; Platt, T; Sathyendranath, S; Ciavatta, S	Sequential variations of phytoplankton growth and mortality in an NPZ model: A remote-sensing-based assessment	2012	-	Tropical	Marine
715	Zhang, Y; Wang, TF; Li, H; Bao, NN; Hall-Spencer, JM; Gao, KS	Rising levels of temperature and CO2 antagonistically affect phytoplankton primary productivity in the South China Sea	2018	-	Tropical	Marine
716	Amorim, CA; Moura, AD	Ecological impacts of freshwater algal blooms on water quality, plankton biodiversity, structure, and ecosystem functioning	2021	-	Tropical	Freshwater
